# Supplementary material for: Differential dynamics and impacts of prophages and plasmids on the pangenome and virulence factor repertoires of Shiga toxin-producing Escherichia coli O145:H28
Source: PubMed Central journal article supplement (PMC7067040; doi:10.1099/mgen.0.000323), 2020-01-14
Supplement: mgen-6-323-s001.pdf [file mgen-6-323-s001.pdf]

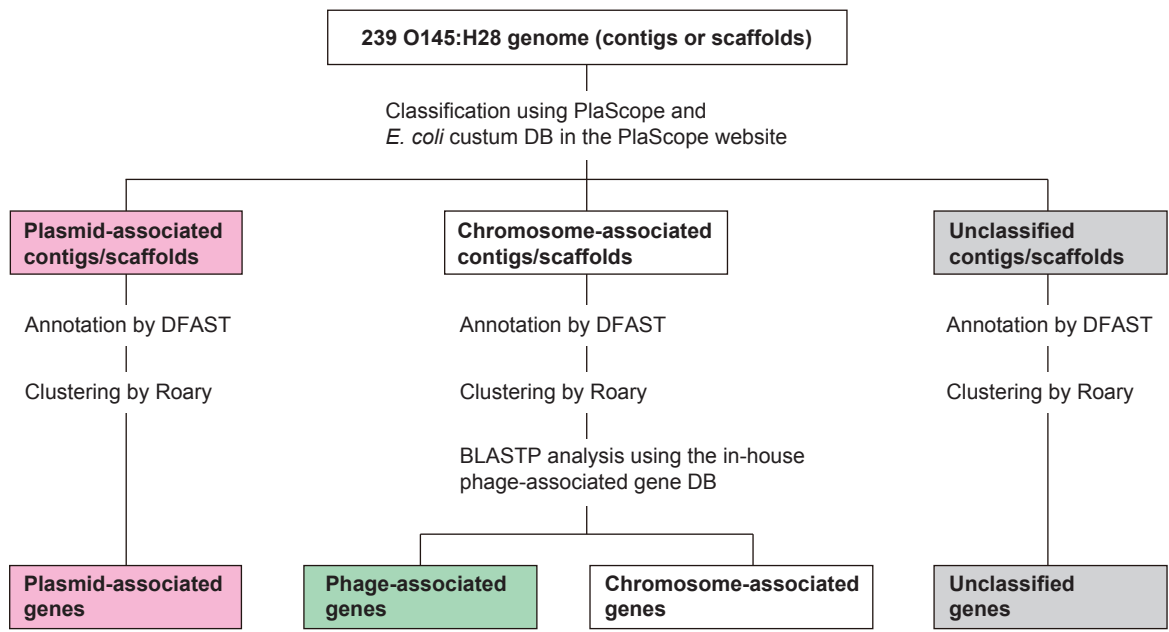

**Fig S1.** Stepwise classification of the O145:H28 genes.

To identify plasmid-associated genes, plasmid- and chromosome-associated scaffolds were extracted from each assembly using PlaScope with the *E. coli* custom database (DB) in the PlaScope website. Genes on the scaffolds classified as plasmid-associated, chromosome-associated, or unclassified were clustered using Roary to determine the proportion of plasmid-associated genes. The proportion of phage-associated genes in the chromosome-associated gene clusters was calculated using an in-house phage-associated gene DB, which was constructed in this study. This DB contained (i) all phage-associated genes identified in this study, (ii) genes identified by our previous genome sequencing of STEC O157:H7, O26:H11, O111:H-, and O103:H2; enteropathogenic *E. coli* (EPEC) O111:H- and O127:H6; and *Serratia marcescens* [1-5], and (iii) the publicly available phage genome data set reported previously [6] (see Table S3 for the details). The longest amino acid sequence in each gene cluster was used to perform a BLASTP search against the phage-associated gene DB constructed to identify the phage-associated gene clusters with a threshold of >60% identity and >60% alignment coverage.

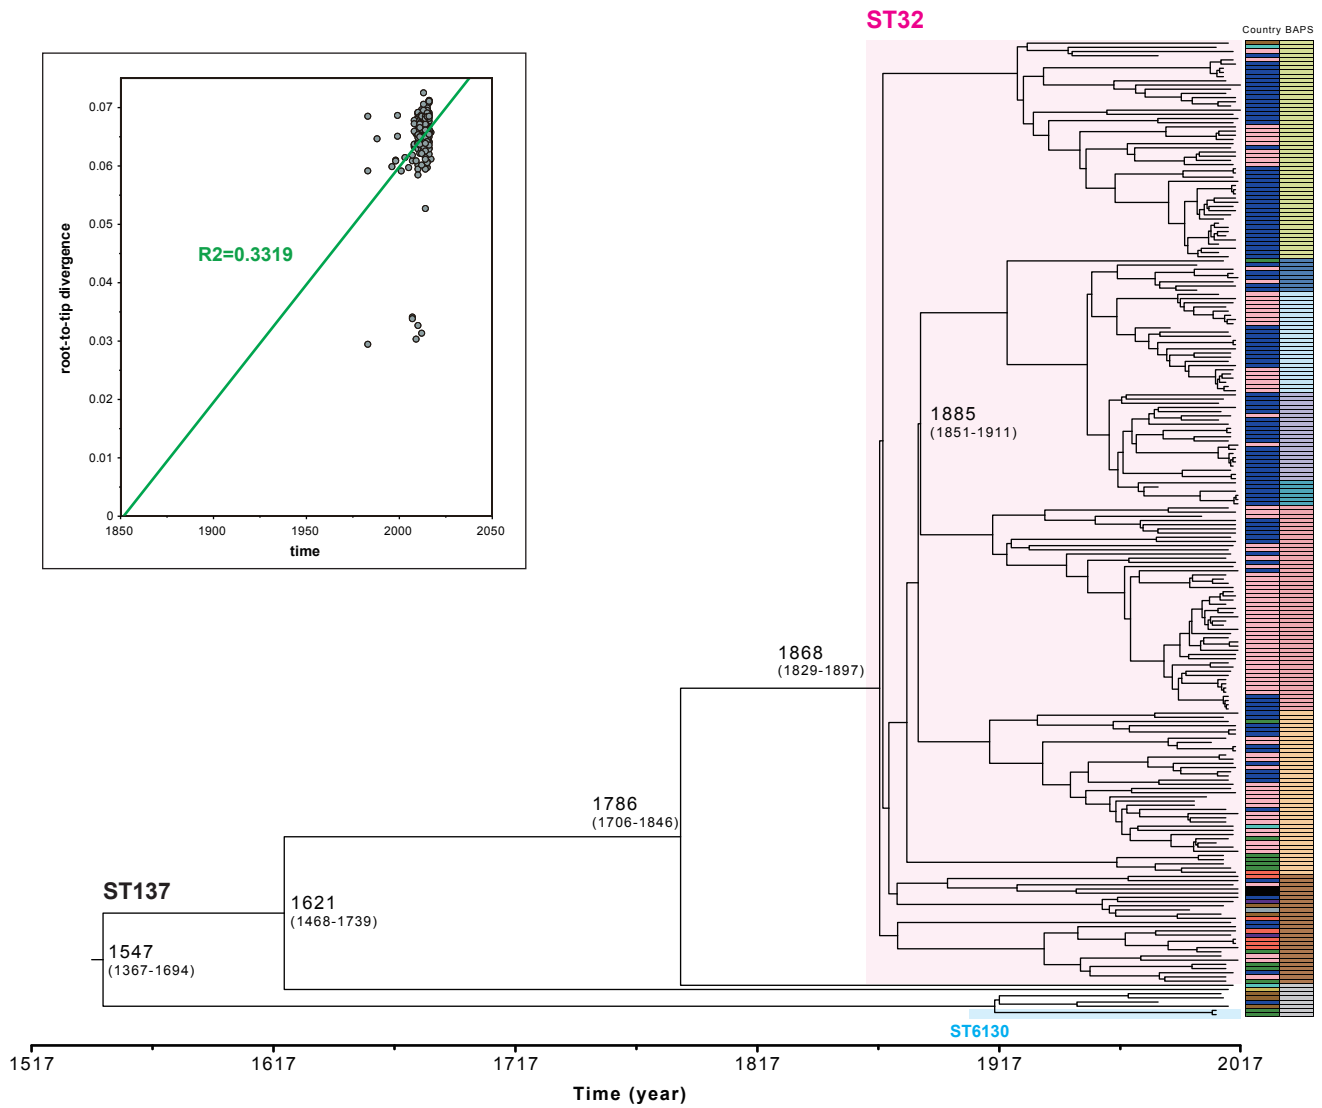

**Fig S2.** A maximum clade credibility tree representing the evolutionary history of O145:H28 strains inferred by Bayesian evolutionary analysis.

The result of regression analysis of root-to-tip distance against sampling date is shown in the inset, indicating positive correlation of genetic distance and sampling date. The time-calibrated phylogenetic tree was reconstructed using BEAST based on 5,208 concatenated recombination-free SNPs. The time to the most recent common ancestor (TMRCA) of each O145:H28 lineage is shown in the tree, and 95% highest posterior density (HPD) is indicated in parentheses. The BAPS clade and geographical information of each strain are also shown. Note that the overall topology of the tree was consistent with that of the ML tree shown in Fig. 1A in the main text.

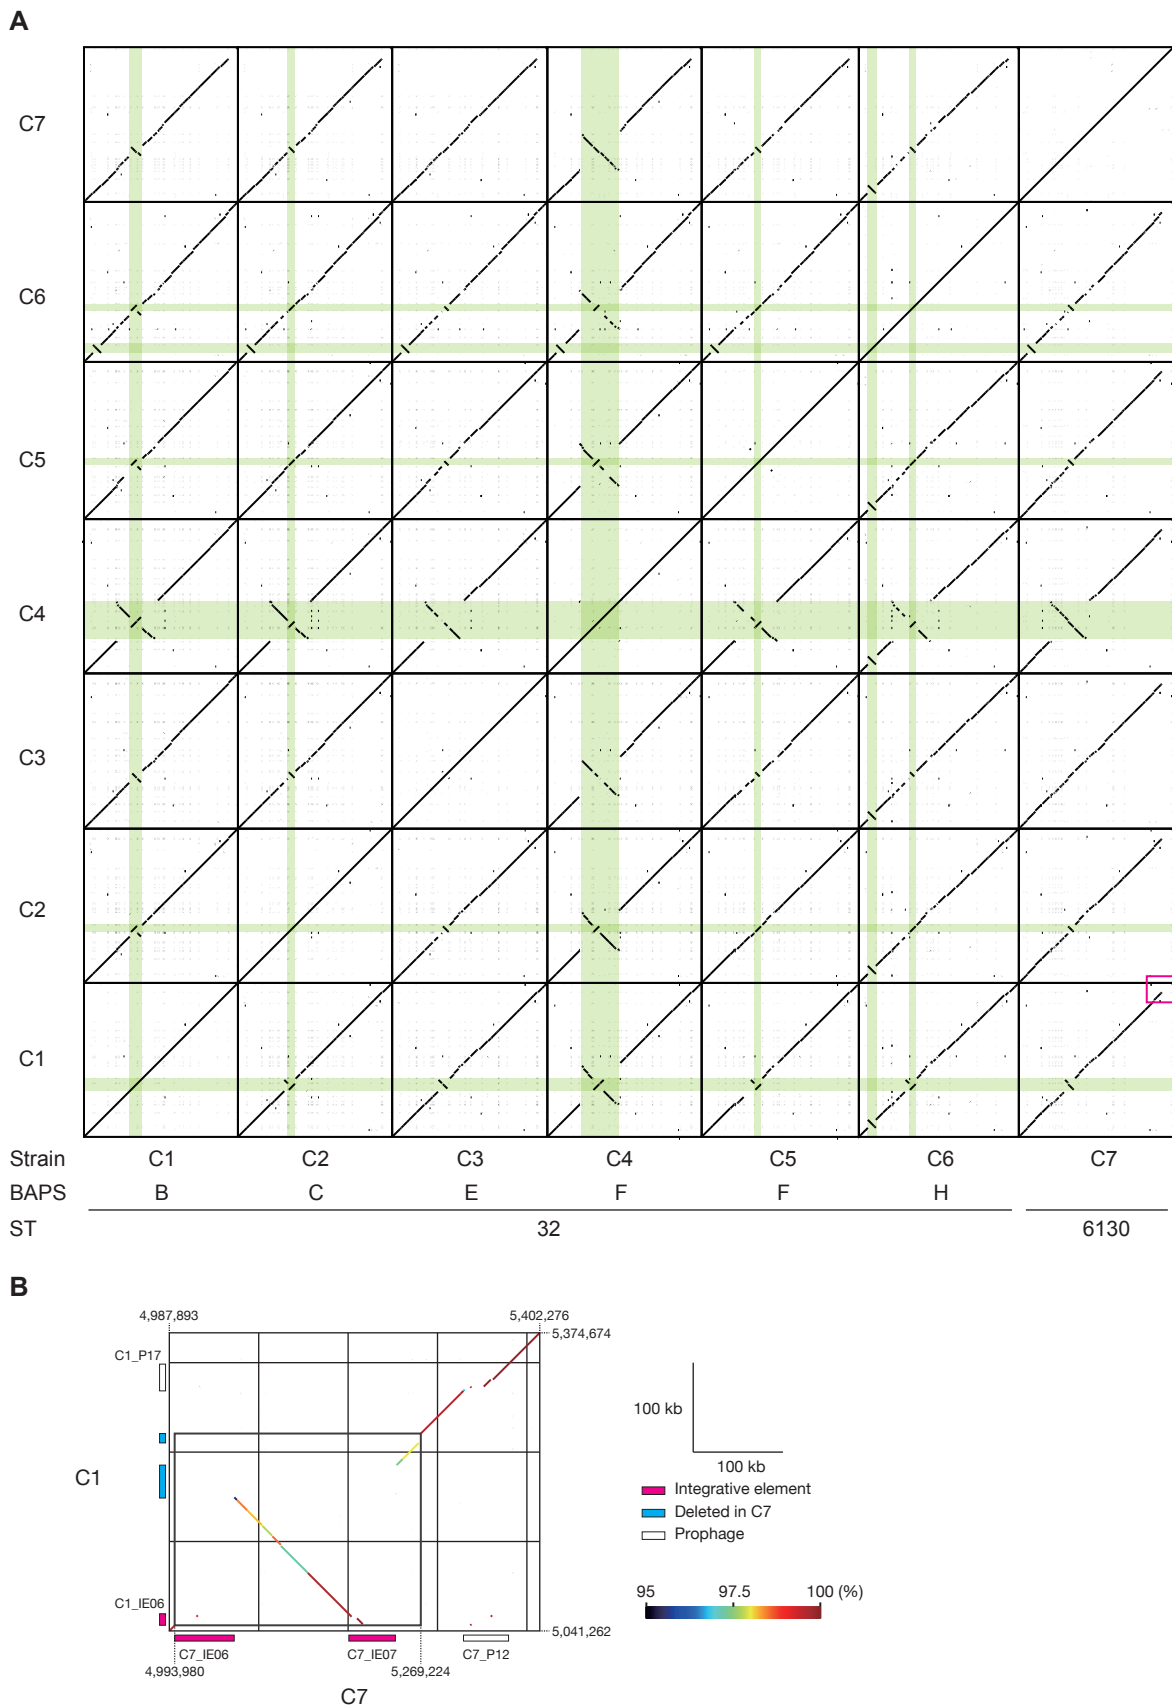

**Fig S3.** Comparison of the chromosome sequences of seven completely sequenced O145:H28 strains. (A) Dot plot presentation of the conservation of chromosome sequences between the seven completely sequenced O145:H28 strains. BLASTN analysis (>99% sequence identity) was performed using the GenomeMatcher software [7] and results were displayed by the same software. The inversions identified are indicated by green shading. (B) An enlarged view of the chromosomal region indicated by a red rectangle in panel A. Sequence identities are indicated by heatmap.

**A**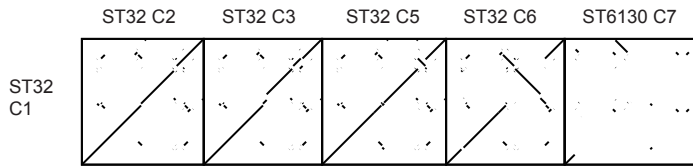**B**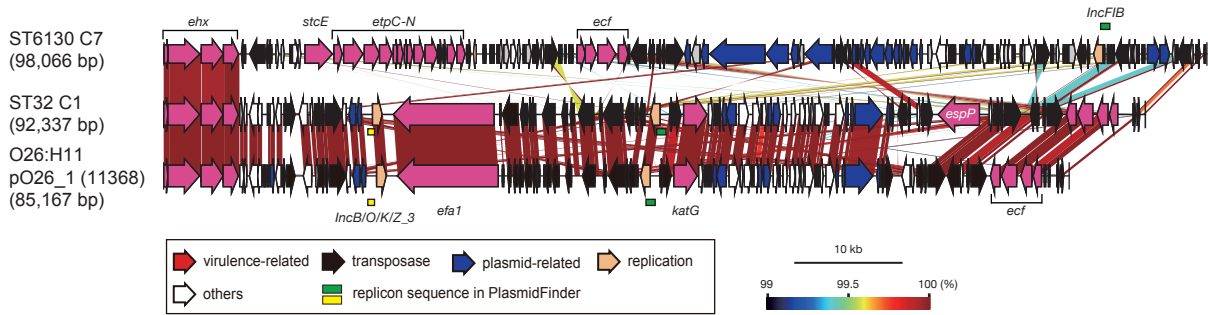**C**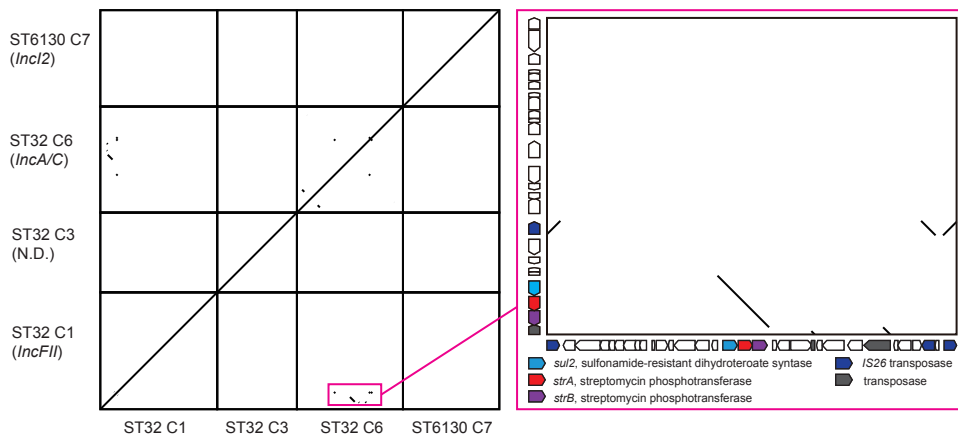**D**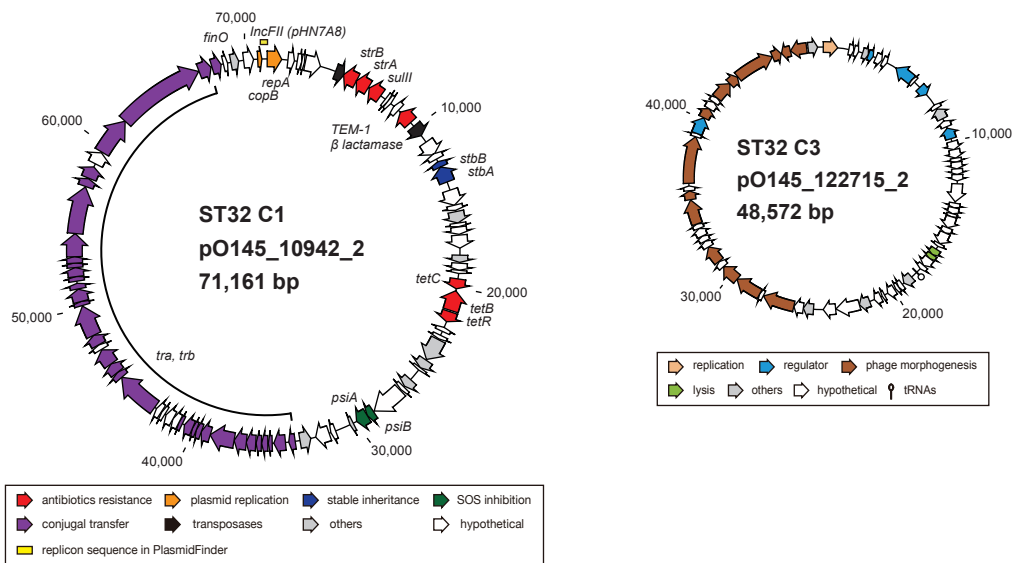

**Fig S4.** Plasmids found in the completely sequenced O145:H28 strains.

(A) Dot plot presentation of the sequence similarity (>99% sequence identity) of the Vir plasmids of six completely sequenced O145:H28 strains. The Vir plasmids of strains RM9872 (C2, accession no. CP028380), 122715 (C3, no. AP019709), 112648 (C5, no. AP019707), RM13514 (C6, no. CP006028), and RM13516 (C7, no. CP006263) were compared with that of strain 10942 (C1, no. AP019704) using BLASTN. The Vir plasmid of the ST6130 strain (C7) was highly divergent in sequence from the ST32 plasmids. (B) Comparison of the Vir plasmid of the O145:H28 strain 10942 (C1) belonging to ST32 with that of the O145:H28 strain RM13516 (C7) belonging to ST6130 and that of the O26:H11 strain 11368 (no. AP010954). The levels of nucleotide sequence identities between CDSs are shown by heatmap. The “plasmid-related” CDSs include those for several plasmid-related functions such as conjugation, partitioning, and SOS inhibition. The GenomeMatcher software was used for BLASTN analyses and displaying the results in panels A and B. (C) The dot plot matrixes of the concatenated sequences of the four NV plasmids each found in the four completely sequenced O145:H28 strains; strains 10942, 122715, RM13514 (no. CP006029) and RM13516 (no. CP006264) are shown. Sequences were compared using the GenomeMatcher software with 90% identity threshold. Several small segments are shared by the C1 and C6 NV plasmids in a region indicated by a magenta-colored rectangle. An enlarged view of this region is also shown. The types of plasmid replicons of each plasmid are indicated in parentheses (N.D., not detected by PlasmidFinder). (D) Circular maps of the NV plasmids found in the two strains sequenced in this study are shown; that of strain 10942 (no. AP019705) and that of strain 122715 (no. AP019710).

Supplemental Table S1. *E. coli* O145:H28 strains analyzed in this study.

| Strain        | ST <sup>1</sup> /clade <sup>2</sup> | stx subtype | Isolation status |                |                               | Genome sequence status |                       |                   |                          |                  |                  |
|---------------|-------------------------------------|-------------|------------------|----------------|-------------------------------|------------------------|-----------------------|-------------------|--------------------------|------------------|------------------|
|               |                                     |             | Country          | Host or Source | Patient symptoms (D, BD, HUS) | Year                   | Levels                | Total length (bp) | No. of scaffolds/contigs | Accession number | Reference        |
| CFSAN026805   | 32/A                                | stx1a/stx2a | USA              | animals        | NI                            | 1999                   | draft                 | 5,259,212         | 199                      | LDCU01000001-199 | [8]              |
| CFSAN026804   | 32/A                                | stx1a/stx2a | USA              | human          | NI                            | 1999                   | draft                 | 5,235,609         | 193                      | LGZD01000001-193 | [8]              |
| EH1904        | 32/A                                | stx2c       | BEL              | human          | BD                            | 2010                   | draft                 | 5,367,273         | 185                      | BJPG01000001-185 | This study       |
| 2015C-3125    | 32/A                                | stx1a/stx2a | USA              | human          | NI                            | 2014                   | complete <sup>3</sup> | 5,604,464         | 3                        | CP027763-5       | [9]              |
| 14040         | 32/A                                | stx1a/stx2a | JPN              | human          | BD                            | 2014                   | draft                 | 5,589,674         | 418                      | BJQW01000001-418 | This study       |
| 14744         | 32/A                                | stx1a/stx2a | JPN              | human          | D                             | 2014                   | draft                 | 5,285,611         | 269                      | BJS01000001-269  | This study       |
| PNUSA001375   | 32/A                                | stx1a/stx2a | USA              | human          | NI                            | 2015                   | draft                 | 5,379,338         | 308                      | SRX1248093       | from the NCBI DB |
| PNUSA002278   | 32/A                                | stx1a/stx2a | USA              | human          | NI                            | 2016                   | draft                 | 5,397,728         | 356                      | SRX1614965       | from the NCBI DB |
| KSU166        | 32/A                                | stx1a/stx2a | USA              | human          | NI                            | N/A                    | draft                 | 5,226,701         | 185                      | SRX3841830       | from the NCBI DB |
| FSIS1500875   | 32/B                                | stx1a       | USA              | foods          | NI                            | 2013                   | draft                 | 5,337,063         | 224                      | SRX1117195       | from the NCBI DB |
| FSIS1501198   | 32/B                                | stx1a       | USA              | animals        | NI                            | 2015                   | draft                 | 5,383,203         | 268                      | SRX11715745      | from the NCBI DB |
| FSIS1503305   | 32/B                                | stx1a       | USA              | animals        | NI                            | 2015                   | draft                 | 5,286,465         | 238                      | SRX1727555       | from the NCBI DB |
| MOD1-EC1641   | 32/B                                | stx1a       | USA              | human          | NI                            | 1988                   | draft                 | 5,216,531         | 304                      | SRX2207756       | from the NCBI DB |
| CFSAN026848   | 32/B                                | stx1a       | USA              | animals        | NI                            | 2013                   | draft                 | 5,233,639         | 172                      | LHIA01000001-172 | [8]              |
| 12E115        | 32/B                                | stx1a/stx2a | JPN              | human          | BD                            | 2012                   | draft                 | 5,502,662         | 220                      | BJPU01000001-220 | This study       |
| 499           | 32/B                                | stx1a/stx2a | JPN              | human          | asymptomatic                  | 2008                   | draft                 | 5,322,234         | 223                      | BJQM01000001-223 | This study       |
| 699           | 32/B                                | stx1a       | JPN              | human          | BD                            | 2011                   | draft                 | 5,403,681         | 225                      | BJQN01000001-225 | This study       |
| 10942         | 32/B                                | stx1a/stx2a | JPN              | human          | BD                            | 2011                   | complete              | 5,538,172         | 3                        | AP019703-5       | This study       |
| 133313        | 32/B                                | stx1a       | JPN              | human          | D                             | 2012                   | draft                 | 5,569,505         | 404                      | BJQS01000001-404 | This study       |
| 140385        | 32/B                                | stx1a/stx2a | JPN              | human          | BD                            | 2013                   | draft                 | 5,486,387         | 449                      | BJQT01000001-449 | This study       |
| 142179        | 32/B                                | stx1a       | JPN              | human          | BD                            | 2014                   | draft                 | 5,309,703         | 375                      | BJRE01000001-375 | This study       |
| 142245        | 32/B                                | stx1a/stx2a | JPN              | human          | asymptomatic                  | 2014                   | draft                 | 5,380,388         | 513                      | BJRF01000001-513 | This study       |
| 150811        | 32/B                                | stx1a       | JPN              | human          | asymptomatic                  | 2013                   | draft                 | 5,387,706         | 365                      | BJRR01000001-365 | This study       |
| 150814        | 32/B                                | stx1a       | JPN              | human          | D                             | 2014                   | draft                 | 5,477,504         | 346                      | BJRS01000001-346 | This study       |
| 150952        | 32/B                                | stx1a/stx2a | JPN              | human          | BD                            | 2015                   | draft                 | 5,549,290         | 336                      | BJRT01000001-336 | This study       |
| 151349        | 32/B                                | stx1a/stx2a | JPN              | human          | BD                            | 2014                   | draft                 | 5,406,502         | 401                      | BJRV01000001-401 | This study       |
| 151733        | 32/B                                | stx1a/stx2a | JPN              | human          | BD                            | 2015                   | draft                 | 5,392,950         | 362                      | BJRX01000001-362 | This study       |
| 160509        | 32/B                                | stx1a       | JPN              | human          | D                             | 2015                   | draft                 | 5,381,015         | 344                      | BJSJ01000001-344 | This study       |
| PNUSA001424   | 32/B                                | stx1a       | USA              | human          | NI                            | 2015                   | draft                 | 5,287,951         | 234                      | SRX1272274       | from the NCBI DB |
| PNUSA001425   | 32/B                                | stx2a       | USA              | human          | NI                            | 2015                   | draft                 | 5,293,769         | 234                      | SRX1272275       | from the NCBI DB |
| PNUSA002248   | 32/B                                | stx1a       | USA              | human          | NI                            | 2012                   | draft                 | 5,282,225         | 376                      | SRX1590518       | from the NCBI DB |
| PNUSA002551   | 32/B                                | stx1a       | USA              | human          | NI                            | 2012                   | draft                 | 5,358,950         | 258                      | SRX1701493       | from the NCBI DB |
| PNUSA003373   | 32/B                                | stx1a       | USA              | human          | NI                            | 2013                   | draft                 | 5,359,175         | 352                      | SRX1939209       | from the NCBI DB |
| 2010C-3162    | 32/C                                | stx1a/stx2a | USA              | human          | NI                            | 2010                   | draft                 | 5,255,693         | 308                      | SRX730371        | from the NCBI DB |
| 2014C-4056    | 32/C                                | stx1a/stx2a | USA              | human          | NI                            | 2014                   | draft                 | 5,334,961         | 227                      | SRX730658        | from the NCBI DB |
| PNUSA000230   | 32/C                                | stx1a/stx2a | USA              | human          | NI                            | 2015                   | draft                 | 5,370,994         | 234                      | SRX869250        | from the NCBI DB |
| PNUSA000273   | 32/C                                | stx1a/stx2a | USA              | human          | NI                            | 2008                   | draft                 | 5,437,182         | 220                      | SRX886075        | from the NCBI DB |
| PNUSA000277   | 32/C                                | stx1a/stx2a | USA              | human          | NI                            | 2008                   | draft                 | 5,295,755         | 255                      | SRX886082        | from the NCBI DB |
| PNUSA000265   | 32/C                                | stx1a       | USA              | human          | NI                            | 2012                   | draft                 | 5,451,835         | 210                      | SRX894085        | from the NCBI DB |
| PNUSA000267   | 32/C                                | stx1a/stx2a | USA              | human          | NI                            | 2012                   | draft                 | 5,456,233         | 213                      | SRX894087        | from the NCBI DB |
| PNUSA000270   | 32/C                                | stx1a/stx2a | USA              | human          | NI                            | 2013                   | draft                 | 5,416,609         | 234                      | SRX894090        | from the NCBI DB |
| PNUSA000272   | 32/C                                | stx1a/stx2a | USA              | human          | NI                            | 2013                   | draft                 | 5,544,591         | 231                      | SRX894091        | from the NCBI DB |
| PNUSA001283   | 32/C                                | stx1a/stx2a | USA              | human          | NI                            | 2015                   | draft                 | 5,372,148         | 324                      | SRX1248156       | from the NCBI DB |
| PNUSA000097   | 32/C                                | stx1a/stx2a | USA              | human          | NI                            | 2014                   | draft                 | 5,411,334         | 259                      | SRX1295165       | from the NCBI DB |
| 132418        | 32/C                                | stx1a       | JPN              | human          | BD                            | 2013                   | draft                 | 5,290,283         | 208                      | BJQL01000001-208 | This study       |
| RM9872        | 32/C                                | stx2a       | USA              | animals        | NI                            | 2009                   | complete              | 5,475,442         | 2                        | CP028379-80      | [10]             |
| 2014C-3084    | 32/C                                | stx1a/stx2a | USA              | human          | NI                            | 2013                   | draft                 | 5,586,933         | 4                        | CP027319-22      | [9]              |
| 16003         | 32/C                                | stx1a/stx2a | JPN              | human          | asymptomatic                  | 2016                   | draft                 | 5,384,645         | 262                      | BJS01000001-262  | This study       |
| PNUSA000897   | 32/C                                | stx1a/stx2a | USA              | human          | NI                            | 2015                   | draft                 | 5,372,340         | 223                      | SRX1272484       | from the NCBI DB |
| PNUSA001434   | 32/C                                | stx1a/stx2a | USA              | human          | NI                            | 2015                   | draft                 | 5,356,405         | 218                      | SRX1301453       | from the NCBI DB |
| PNUSA001746   | 32/C                                | stx2a       | USA              | human          | NI                            | 2015                   | draft                 | 5,319,852         | 198                      | SRX1471477       | from the NCBI DB |
| PNUSA001714   | 32/C                                | stx2a       | USA              | human          | NI                            | 2015                   | draft                 | 5,323,250         | 193                      | SRX1471500       | from the NCBI DB |
| PNUSA001900   | 32/C                                | stx1a/stx2a | USA              | human          | NI                            | N/A                    | draft                 | 5,324,566         | 233                      | SRX1541848       | from the NCBI DB |
| PNUSA001520   | 32/C                                | stx1a/stx2a | USA              | human          | NI                            | 2015                   | draft                 | 5,377,136         | 252                      | SRX1541921       | from the NCBI DB |
| 2014C-3105    | 32/C                                | stx1a/stx2a | USA              | human          | NI                            | 2013                   | draft                 | 5,337,918         | 189                      | SRX1594668       | from the NCBI DB |
| KSU165        | 32/C                                | stx1a       | USA              | human          | NI                            | N/A                    | draft                 | 5,322,193         | 252                      | SRX3841832       | from the NCBI DB |
| FSIS1504619   | 32/D                                | stx1a       | USA              | foods          | NI                            | 2015                   | draft                 | 5,303,863         | 244                      | SRX1386649       | from the NCBI DB |
| MOD1-EC6137   | 32/D                                | stx1a       | USA              | animals        | NI                            | 1983                   | draft                 | 5,246,835         | 380                      | SRX1991250       | from the NCBI DB |
| PNUSA0003246  | 32/D                                | stx1a       | USA              | human          | NI                            | 2016                   | draft                 | 5,356,138         | 218                      | SRX1828787       | from the NCBI DB |
| PNUSA0003283  | 32/D                                | stx1a       | USA              | human          | NI                            | 2016                   | draft                 | 5,392,570         | 288                      | SRX1874969       | from the NCBI DB |
| PNUSA0003289  | 32/D                                | stx1a       | USA              | human          | NI                            | 2016                   | draft                 | 5,346,113         | 327                      | SRX1874973       | from the NCBI DB |
| 2015-10-218 E | 32/D                                | stx1a       | USA              | animals        | NI                            | 2015                   | draft                 | 5,326,063         | 221                      | SRX3841831       | from the NCBI DB |
| PNUSA000466   | 32/E                                | stx2a       | USA              | human          | NI                            | 2015                   | draft                 | 5,421,540         | 204                      | SRX986531        | from the NCBI DB |
| PNUSA000494   | 32/E                                | stx2c       | USA              | human          | NI                            | 2015                   | draft                 | 5,272,079         | 233                      | SRX1037189       | This study       |
| FSIS1505314   | 32/E                                | stx2c       | USA              | foods          | NI                            | 2015                   | draft                 | 5,339,409         | 251                      | SRX1534642       | from the NCBI DB |
| FSIS1503307   | 32/E                                | stx2c       | USA              | human          | NI                            | 2015                   | draft                 | 5,318,248         | 316                      | SRX1727571       | from the NCBI DB |
| 2012C-4474    | 32/E                                | stx2a       | USA              | human          | NI                            | 2012                   | draft                 | 5,330,659         | 224                      | SRX347702        | from the NCBI DB |
| 2012C-4477    | 32/E                                | stx2a       | USA              | human          | NI                            | 2012                   | draft                 | 5,308,360         | 215                      | SRX347703        | from the NCBI DB |
| 2012C-4480    | 32/E                                | stx2a       | USA              | human          | NI                            | 2012                   | draft                 | 5,301,179         | 230                      | SRX347706        | from the NCBI DB |
| 5044          | 32/E                                | stx2c       | JPN              | human          | asymptomatic                  | 2001                   | draft                 | 5,351,828         | 175                      | BJPC01000001-175 | This study       |
| 09E126        | 32/E                                | stx2a       | JPN              | human          | asymptomatic                  | 2010                   | draft                 | 5,246,165         | 160                      | BJPR01000001-160 | This study       |
| 12E070        | 32/E                                | stx2a       | JPN              | human          | BD                            | 2012                   | draft                 | 5,408,754         | 188                      | BJPS01000001-188 | This study       |
| 12E109        | 32/E                                | stx2a       | JPN              | human          | BD                            | 2012                   | draft                 | 5,448,273         | 211                      | BJPT01000001-211 | This study       |
| 110509        | 32/E                                | stx2a       | JPN              | human          | BD                            | 2010                   | draft                 | 5,328,432         | 181                      | BJPW01000001-181 | This study       |
| 111430        | 32/E                                | stx2a       | JPN              | human          | BD                            | 2011                   | draft                 | 5,302,274         | 185                      | BJPX01000001-185 | This study       |
| 112312        | 32/E                                | stx2a       | JPN              | human          | BD                            | 2011                   | draft                 | 5,425,291         | 189                      | BJPZ01000001-189 | This study       |
| 112716        | 32/E                                | stx2a       | JPN              | human          | BD                            | 2011                   | draft                 | 5,428,605         | 202                      | BJQA01000001-202 | This study       |
| 120517        | 32/E                                | stx2a       | JPN              | human          | BD                            | 2011                   | draft                 | 5,395,458         | 198                      | BJQE01000001-198 | This study       |
| 121427        | 32/E                                | stx1a       | JPN              | human          | BD                            | 2012                   | draft                 | 5,344,121         | 220                      | BJQF01000001-220 | This study       |
| 122200        | 32/E                                | stx2a       | JPN              | human          | BD                            | 2012                   | draft                 | 5,467,448         | 198                      | BJQG01000001-198 | This study       |
| 122715        | 32/E                                | stx2a       | JPN              | human          | BD/HUS                        | 2012                   | complete              | 5,554,407         | 3                        | AP019708-10      | This study       |
| 130296        | 32/E                                | stx2a       | JPN              | human          | BD                            | 2012                   | draft                 | 5,579,873         | 194                      | BJQH01000001-194 | This study       |
| 131713        | 32/E                                | stx2a       | JPN              | human          | BD                            | 2013                   | draft                 | 5,333,843         | 206                      | BJQI01000001-206 | This study       |
| 131990        | 32/E                                | stx2a       | JPN              | human          | BD                            | 2013                   | draft                 | 5,319,215         | 189                      | BJQJ01000001-189 | This study       |
| PV11-135      | 32/E                                | stx2a       | JPN              | human          | asymptomatic                  | 2011                   | draft                 | 5,515,179         | 222                      | BJQK01000001-222 | This study       |
| PV11-59       | 32/E                                | stx2a       | JPN              | human          | BD                            | 2011                   | draft                 | 5,256,396         | 217                      | BJQL01000001-217 | This study       |
| PV11-77       | 32/E                                | stx2a       | JPN              | human          | D                             | 2011                   | draft                 | 5,364,930         | 217                      | BJQM01000001-217 | This study       |
| EC3283        | 32/E                                | stx2a       | JPN              | human          | BD                            | 2011                   | draft                 | 5,333,988         | 200                      | BJQR01000001-200 | This study       |
| 140933        | 32/E                                | stx2a       | JPN              | human          | BD                            | 2014                   | draft                 | 5,473,770         | 565                      | BJQS01000001-565 | This study       |
| 141500        | 32/E                                | stx2a       | JPN              | human          | BD                            | 2014                   | draft                 | 5,399,454         | 559                      | BJRT01000001-559 | This study       |
| 142095        | 32/E                                | stx2a       | JPN              | human          | BD                            | 2014                   | draft                 | 5,375,308         | 444                      | BJRD01000001-444 | This study       |
| 142527        | 32/E                                | stx2a       | JPN              | human          | BD                            | 2014                   | draft                 | 5,316,486         | 297                      | BJRI01000001-297 | This study       |
| 142664        | 32/E                                | stx2a       | JPN              | human          | asymptomatic                  | 2014                   | draft                 | 5,379,057         | 333                      | BJRK01000001-333 | This study       |
| 150316        | 32/E                                | stx2a       | JPN              | human          | D                             | 2014                   | draft                 | 5,219,026         | 241                      | BJRO01000001-241 | This study       |
| 150317        | 32/E                                | stx2a       | JPN              | human          | BD                            | 2014                   | draft                 | 5,186,409         | 366                      | BJRP01000001-366 | This study       |
| 151109        | 32/E                                | stx2a       | JPN              | human          | BD                            | 2015                   | draft                 | 5,487,311         | 557                      | BJRU01000001-557 | This study       |
| 151747        | 32/E                                | stx2a       | JPN              | human          | BD                            | 2015                   | draft                 | 5,381,811         | 354                      | BJRY01000001-354 | This study       |
| 151836        | 32/E                                | stx2a       | JPN              | human          | BD                            | 2015                   | draft                 | 5,405,340         | 322                      | BJRZ01000001-322 | This study       |
| 152767        | 32/E                                | stx2a       | JPN              | human          | D                             | 2015                   | draft                 | 5,428,297         | 272                      | BJSF01000001-272 | This study       |
| 153152        | 32/E                                | stx1a       | JPN              | human          | asymptomatic                  | 2015                   | draft                 | 5,326,786         | 350                      | BJS01000001-350  | This study       |
| 160674        | 32/E                                | stx2a       | JPN              | human          | BD                            | 2016                   | draft                 | 5,270,910         | 270                      | BJSK01000001-270 | This study       |
| 161161        | 32/E                                | stx2a       | JPN              | human          | D                             | 2016                   | draft                 | 5,323,161         | 277                      | BJS01000001-277  | This study       |
| 161318        | 32/E                                | stx2a       | JPN              | human          | BD                            | 2016                   | draft                 | 5,313,480         | 226                      | BJSP01000001-226 | This study       |
| 161676        | 32/E                                | stx2a       | JPN              | human          | asymptomatic                  | 2016                   | draft                 | 5,375,572         | 235                      | BJSQ01000001-235 | This study       |
| 162442        | 32/E                                | stx2a       | JPN              | human          | BD                            | 2016                   | draft                 | 5,364,186         | 294                      | BJST01000001-294 | This study       |
| PNUSA001216   | 32/E                                | stx2c       | USA              | human          | NI                            | 2015                   | draft                 | 5,345,406         |                          |                  |                  |

|              |              |                    |     |          |              |      |          |           |     |                   |                  |
|--------------|--------------|--------------------|-----|----------|--------------|------|----------|-----------|-----|-------------------|------------------|
| 9793         | 32/F         | <i>stx1a</i>       | JPN | human    | D            | 2005 | draft    | 5,414,155 | 218 | BJPE01000001-218  | This study       |
| EH1910       | 32/F         | <i>stx2a</i>       | BEL | human    | D            | 2010 | draft    | 5,479,003 | 259 | BJPH01000001-259  | This study       |
| EH1995       | 32/F         | <i>stx1a</i>       | BEL | foods    | NI           | 2010 | draft    | 5,294,665 | 194 | BJPI01000001-194  | This study       |
| EH2197       | 32/F         | <i>stx1a</i>       | BEL | human    | BD           | 2012 | draft    | 5,328,179 | 223 | BJPM01000001-223  | This study       |
| EH2201       | 32/F         | <i>stx2a</i>       | BEL | human    | HUS          | 2012 | draft    | 5,422,499 | 230 | BJPN01000001-230  | This study       |
| EH2246       | 32/F         | <i>stx2a</i>       | BEL | human    | HUS          | 2013 | draft    | 5,332,058 | 239 | BJPO01000001-239  | This study       |
| EH1992       | 32/F         | <i>stx1a</i>       | BEL | foods    | NI           | 2010 | draft    | 5,292,610 | 216 | BJPP01000001-216  | This study       |
| 111698       | 32/F         | <i>stx1a</i>       | JPN | human    | BD           | 2011 | draft    | 5,325,755 | 205 | BJPY01000001-205  | This study       |
| 112648       | 32/F         | <i>stx1a/stx2a</i> | JPN | human    | BD           | 2011 | complete | 5,579,570 | 2   | AP019706-7        | This study       |
| 112808       | 32/F         | <i>stx1a/stx2d</i> | JPN | human    | BD           | 2011 | draft    | 5,391,812 | 244 | BJQB01000001-244  | This study       |
| 120412       | 32/F         | <i>stx1a</i>       | JPN | human    | BD           | 2011 | draft    | 5,317,204 | 226 | BJQD01000001-226  | This study       |
| 131719       | 32/F         | <i>stx1a</i>       | JPN | human    | BD           | 2013 | draft    | 5,337,867 | 184 | BJQJ01000001-184  | This study       |
| 95-3192      | 32/F         | <i>stx2a</i>       | USA | clinical | NI           | N/A  | complete | 5,385,516 | 1   | CP027362          | This study       |
| 141262       | 32/F         | <i>stx1a</i>       | JPN | human    | BD           | 2014 | draft    | 5,380,321 | 419 | BJQZ01000001-419  | This study       |
| 142526       | 32/F         | <i>stx1a</i>       | JPN | human    | BD           | 2014 | draft    | 5,429,155 | 552 | BJRI01000001-552  | This study       |
| 142612       | 32/F         | <i>stx1a</i>       | JPN | human    | asymptomatic | 2014 | draft    | 5,356,137 | 380 | BJRJ01000001-380  | This study       |
| 150034       | 32/F         | <i>stx1a</i>       | JPN | human    | BD           | 2014 | draft    | 5,273,839 | 455 | BJRL01000001-455  | This study       |
| 150149       | 32/F         | <i>stx1a/stx2a</i> | JPN | human    | BD           | 2014 | draft    | 5,354,787 | 339 | BJRM01000001-339  | This study       |
| 152282       | 32/F         | <i>stx1a</i>       | JPN | human    | BD           | 2015 | draft    | 5,273,151 | 291 | BJSB01000001-291  | This study       |
| 152517       | 32/F         | <i>stx1a</i>       | JPN | human    | BD           | 2015 | draft    | 5,342,346 | 346 | BJSE01000001-346  | This study       |
| 162405       | 32/F         | <i>stx1a</i>       | JPN | human    | D            | 2016 | draft    | 5,382,844 | 280 | BJSS01000001-280  | This study       |
| 162594       | 32/F         | <i>stx1a</i>       | JPN | human    | asymptomatic | 2016 | draft    | 5,387,253 | 240 | BJSU01000001-240  | This study       |
| PNUSA0002018 | 32/F         | <i>stx1a</i>       | USA | human    | NI           | 2012 | draft    | 5,382,310 | 377 | SRX1561961        | from the NCBI DB |
| PNUSA001966  | 32/F         | <i>stx2a</i>       | USA | human    | NI           | 2015 | draft    | 5,325,211 | 336 | SRX1562052        | from the NCBI DB |
| PNUSA001969  | 32/F         | <i>stx2a</i>       | USA | human    | NI           | 2015 | draft    | 5,309,532 | 221 | SRX1562055        | from the NCBI DB |
| PNUSA0002250 | 32/F         | <i>stx2a</i>       | USA | human    | NI           | 2015 | draft    | 5,397,176 | 344 | SRX1590519        | from the NCBI DB |
| 2013C-4497   | 32/F         | <i>stx1a</i>       | USA | human    | NI           | 2013 | draft    | 5,402,162 | 263 | SRX1599927        | from the NCBI DB |
| PNUSA002645  | 32/F         | <i>stx2a</i>       | USA | human    | NI           | 2016 | draft    | 5,398,467 | 227 | SRX1733495        | from the NCBI DB |
| PNUSA000738  | 32/G         | <i>stx2a</i>       | USA | human    | NI           | 2014 | draft    | 5,398,786 | 223 | SRX1305472        | from the NCBI DB |
| 241810       | 32/G         | negative           | GBR | human    | NI           | 2016 | draft    | 5,291,605 | 277 | SRX1793482        | from the NCBI DB |
| 241761       | 32/G         | <i>stx2a</i>       | GBR | human    | NI           | 2016 | draft    | 5,308,521 | 350 | SRX1793510        | from the NCBI DB |
| 132030       | 32/G         | <i>stx2a</i>       | GBR | human    | NI           | 2015 | draft    | 5,278,508 | 295 | SRX1795568        | from the NCBI DB |
| 130322       | 32/G         | <i>stx2a</i>       | GBR | human    | NI           | 2015 | draft    | 5,278,766 | 317 | SRX1796216        | from the NCBI DB |
| 173582       | 32/G         | <i>stx2a</i>       | GBR | human    | NI           | 2015 | draft    | 5,382,143 | 303 | SRX1797196        | from the NCBI DB |
| FH195        | 32/G         | <i>stx2a</i>       | NOR | human    | NI           | 2010 | draft    | 5,175,895 | 124 | CCRD00000001-134  | [12]             |
| FH182        | 32/G         | <i>stx2a</i>       | NOR | human    | BD           | 2009 | draft    | 5,529,476 | 47  | LM996757-LM996803 | [12]             |
| STEC1442     | 32/G         | <i>stx2a</i>       | NLD | human    | BD           | 2014 | draft    | 5,369,955 | 170 | LOGK00000001-170  | [13]             |
| 4865_96      | 32/G         | <i>stx2a</i>       | DEU | human    | NI           | 1996 | draft    | 5,220,130 | 345 | AGTL00000001-345  | from the NCBI DB |
| STEC731      | 32/G         | <i>stx2a</i>       | NLD | human    | D            | 2013 | draft    | 5,251,140 | 170 | LOFN01000001-170  | [13]             |
| EH1846       | 32/G         | <i>stx2a</i>       | BEL | human    | BD           | 2009 | draft    | 5,347,600 | 237 | BJPF01000001-237  | This study       |
| EH2011       | 32/G         | <i>stx2a</i>       | BEL | human    | BD           | 2011 | draft    | 5,379,469 | 193 | BJPI01000001-193  | This study       |
| EH2085       | 32/G         | <i>stx2a</i>       | BEL | human    | BD           | 2011 | draft    | 5,358,269 | 243 | BJPK01000001-243  | This study       |
| EH2086       | 32/G         | <i>stx2a</i>       | BEL | human    | HUS          | 2011 | draft    | 5,364,897 | 225 | BJPL01000001-225  | This study       |
| 09E025       | 32/G         | <i>stx2a</i>       | JPN | human    | BD           | 2009 | draft    | 5,541,177 | 201 | BJPQ01000001-201  | This study       |
| 112991       | 32/G         | <i>stx2a</i>       | JPN | human    | BD           | 2011 | draft    | 5,291,602 | 194 | BJQC01000001-194  | This study       |
| 95           | 32/G         | <i>stx2a</i>       | JPN | human    | asymptomatic | 2014 | draft    | 5,622,467 | 468 | BJRC01000001-468  | This study       |
| 16002        | 32/G         | <i>stx2a</i>       | JPN | human    | BD           | 2016 | draft    | 5,236,402 | 258 | BJSN01000001-258  | This study       |
| PNUSA001494  | 32/G         | <i>stx2a</i>       | USA | human    | NI           | 2015 | draft    | 5,427,404 | 243 | SRX1309273        | from the NCBI DB |
| PNUSA0002415 | 32/G         | <i>stx2a</i>       | USA | human    | NI           | N/A  | draft    | 5,417,344 | 231 | SRX1653106        | from the NCBI DB |
| PNUSA0002493 | 32/G         | <i>stx2c</i>       | USA | human    | NI           | N/A  | draft    | 5,342,920 | 384 | SRX1709510        | from the NCBI DB |
| PNUSA0002883 | 32/G         | <i>stx2a</i>       | USA | human    | NI           | 2016 | draft    | 5,300,226 | 182 | SRX1733464        | from the NCBI DB |
| PNUSA0003213 | 32/G         | <i>stx2a</i>       | USA | human    | NI           | 2016 | draft    | 5,344,723 | 219 | SRX1837222        | from the NCBI DB |
| 2014C-3004   | 32/G         | <i>stx1a</i>       | USA | human    | NI           | 2013 | draft    | 5,354,443 | 218 | SRX1926637        | from the NCBI DB |
| VL1495n      | 32/G         | negative           | NZL | animals  | NI           | 2016 | draft    | 5,226,866 | 287 | SRX3294556        | from the NCBI DB |
| VL1287n      | 32/G         | negative           | NZL | animals  | NI           | 2016 | draft    | 5,330,426 | 358 | SRX3294534        | from the NCBI DB |
| 82EXG        | 32/G         | <i>stx2a</i>       | GBR | human    | D            | 2015 | draft    | 5,283,767 | 427 | SRX3421138        | from the NCBI DB |
| 2014C-3016   | 32/H         | <i>stx1a</i>       | USA | human    | NI           | 2014 | draft    | 5,445,567 | 362 | SRX730487         | from the NCBI DB |
| PNUSA000139  | 32/H         | <i>stx2a</i>       | USA | human    | NI           | 2014 | draft    | 5,658,338 | 442 | SRX826410         | from the NCBI DB |
| PNUSA000274  | 32/H         | <i>stx2a</i>       | USA | human    | NI           | 2008 | draft    | 5,696,569 | 274 | SRX886878         | from the NCBI DB |
| PNUSA000275  | 32/H         | <i>stx2a</i>       | USA | human    | NI           | 2008 | draft    | 5,472,081 | 254 | SRX886880         | from the NCBI DB |
| PNUSA000276  | 32/H         | <i>stx2a</i>       | USA | human    | NI           | 2008 | draft    | 5,668,642 | 270 | SRX886881         | from the NCBI DB |
| PNUSA000261  | 32/H         | <i>stx2a</i>       | USA | human    | NI           | 2011 | draft    | 5,445,153 | 268 | SRX894081         | from the NCBI DB |
| PNUSA000262  | 32/H         | <i>stx2a</i>       | USA | human    | NI           | 2011 | draft    | 5,467,882 | 283 | SRX894082         | from the NCBI DB |
| PNUSA000264  | 32/H         | <i>stx2a</i>       | USA | human    | NI           | 2012 | draft    | 5,497,781 | 298 | SRX894084         | from the NCBI DB |
| PNUSA000266  | 32/H         | <i>stx2a</i>       | USA | human    | NI           | 2012 | draft    | 5,507,907 | 291 | SRX894086         | from the NCBI DB |
| PNUSA000268  | 32/H         | <i>stx2a</i>       | USA | human    | NI           | 2012 | draft    | 5,466,687 | 252 | SRX894088         | from the NCBI DB |
| PNUSA000269  | 32/H         | <i>stx1a/stx2a</i> | USA | human    | NI           | 2013 | draft    | 5,475,754 | 319 | SRX894089         | from the NCBI DB |
| PNUSA000259  | 32/H         | <i>stx2a</i>       | USA | human    | NI           | 2010 | draft    | 5,741,972 | 293 | SRX913333         | from the NCBI DB |
| FSIS1503258  | 32/H         | <i>stx2a</i>       | USA | animals  | NI           | 2014 | draft    | 5,468,837 | 291 | SRX1122551        | from the NCBI DB |
| PNUSA001370  | 32/H         | <i>stx2a</i>       | USA | human    | NI           | 2015 | draft    | 5,471,571 | 239 | SRX1248088        | from the NCBI DB |
| PNUSA001336  | 32/H         | <i>stx2a</i>       | USA | human    | NI           | 2015 | draft    | 5,462,427 | 257 | SRX1248138        | from the NCBI DB |
| PNUSA001339  | 32/H         | <i>stx2a</i>       | USA | human    | NI           | 2015 | draft    | 5,559,972 | 306 | SRX1248141        | from the NCBI DB |
| PNUSA001340  | 32/H         | <i>stx2a</i>       | USA | human    | NI           | 2015 | draft    | 5,640,630 | 362 | SRX1248142        | from the NCBI DB |
| PNUSA001342  | 32/H         | <i>stx2a</i>       | USA | human    | NI           | 2015 | draft    | 5,553,186 | 332 | SRX1248144        | from the NCBI DB |
| PNUSA001285  | 32/H         | <i>stx2a</i>       | USA | human    | NI           | 2015 | draft    | 5,466,427 | 285 | SRX1248158        | from the NCBI DB |
| PNUSA000889  | 32/H         | <i>stx2a</i>       | USA | human    | NI           | 2013 | draft    | 5,382,632 | 288 | SRX1272475        | from the NCBI DB |
| FSIS1605420  | 32/H         | <i>stx2a</i>       | USA | foods    | NI           | 2015 | draft    | 5,623,993 | 358 | SRX1534641        | from the NCBI DB |
| FSIS1605419  | 32/H         | <i>stx2a</i>       | USA | foods    | NI           | 2015 | draft    | 5,612,498 | 331 | SRX1534643        | from the NCBI DB |
| PNUSA000756  | 32/H         | <i>stx2a</i>       | USA | human    | NI           | 2014 | draft    | 5,430,683 | 307 | SRX1772444        | from the NCBI DB |
| MOD1-EC5842  | 32/H         | negative           | USA | animals  | NI           | 1983 | draft    | 5,336,160 | 286 | SRX1988695        | from the NCBI DB |
| RM13514      | 32/H         | <i>stx2a</i>       | USA | human    | NI           | 2010 | complete | 5,737,294 | 3   | CP006027-9        | [14]             |
| SOlav172     | 32/H         | <i>stx2a</i>       | NOR | human    | BD           | 2012 | draft    | 5,562,109 | 239 | JZD01000001-239   | [15]             |
| CFSAAN026846 | 32/H         | <i>stx2a</i>       | USA | animals  | NI           | 2013 | draft    | 5,427,855 | 237 | LGZ01000001-237   | [8]              |
| 12E129       | 32/H         | <i>stx2a</i>       | JPN | human    | BD           | 2013 | draft    | 5,458,196 | 248 | BJPV01000001-248  | This study       |
| IB14005      | 32/H         | <i>stx2a</i>       | JPN | human    | D            | 2014 | draft    | 5,496,386 | 525 | BJQU01000001-525  | This study       |
| 141115       | 32/H         | <i>stx2a</i>       | JPN | human    | D            | 2014 | draft    | 5,634,174 | 497 | BJQY01000001-497  | This study       |
| 140166       | 32/H         | <i>stx2a</i>       | JPN | human    | BD           | 2014 | draft    | 5,568,417 | 481 | BJRA01000001-481  | This study       |
| 150222       | 32/H         | <i>stx1a</i>       | JPN | human    | D            | 2014 | draft    | 5,517,690 | 630 | BJRN01000001-630  | This study       |
| Ech14022     | 32/H         | <i>stx2a</i>       | JPN | human    | BD           | 2014 | draft    | 5,407,725 | 349 | BJRO01000001-349  | This study       |
| H27V05       | 32/H         | <i>stx2a</i>       | JPN | human    | BD           | 2015 | draft    | 5,634,447 | 470 | BJRW01000001-470  | This study       |
| EC3734       | 32/H         | <i>stx2a</i>       | JPN | human    | BD           | 2015 | draft    | 5,638,456 | 363 | BJSC01000001-363  | This study       |
| 152489       | 32/H         | <i>stx2a</i>       | JPN | human    | BD           | 2015 | draft    | 5,436,133 | 313 | BJSD01000001-313  | This study       |
| 160018       | 32/H         | <i>stx2a</i>       | JPN | human    | D            | 2015 | draft    | 5,442,475 | 308 | BJSH01000001-308  | This study       |
| KIH15-140    | 32/H         | <i>stx2a</i>       | JPN | human    | D            | 2015 | draft    | 5,582,205 | 345 | BJSI01000001-345  | This study       |
| PNUSA000631  | 32/H         | <i>stx2a</i>       | USA | human    | NI           | 2015 | draft    | 5,516,756 | 289 | SRX1053602        | from the NCBI DB |
| PNUSA001624  | 32/H         | <i>stx2a</i>       | USA | human    | NI           | 2015 | draft    | 5,371,636 | 325 | SRX1471562        | from the NCBI DB |
| PNUSA001606  | 32/H         | <i>stx2a</i>       | USA | human    | NI           | 2015 | draft    | 5,451,288 | 253 | SRX1478490        | from the NCBI DB |
| PNUSA0002446 | 32/H         | <i>stx2a</i>       | USA | human    | NI           | 2016 | draft    | 5,555,362 | 267 | SRX1628904        | from the NCBI DB |
| 2010C-3515   | 32/H         | <i>stx2a</i>       | USA | human    | NI           | 2010 | draft    | 5,552,488 | 249 | SRX1659897        | from the NCBI DB |
| 2010C-3522   | 32/H         | <i>stx2a</i>       | USA | human    | NI           | 2010 | draft    | 5,496,903 | 228 | SRX1659899        | from the NCBI DB |
| PNUSA0002575 | 32/H         | <i>stx2a</i>       | USA | human    | NI           | 2016 | draft    | 5,360,187 | 342 | SRX1701487        | from the NCBI DB |
| PNUSA0002440 | 32/H         | <i>stx2a</i>       | USA | human    | NI           | 2015 | draft    | 5,497,632 | 365 | SRX1701512        | from the NCBI DB |
| PNUSA0003020 | 32/H         | <i>stx2a</i>       | USA | human    | NI           | 2011 | draft    | 5,513,357 | 422 | SRX1770373        | from the NCBI DB |
| PNUSA0003447 | 32/H         | <i>stx2a</i>       | USA | human    | NI           | 2016 | draft    | 5,557,942 | 346 | SRX1884239        | from the NCBI DB |
| PNUSA0003371 | 32/H         | <i>stx2a</i>       | USA | human    | NI           | 2013 | draft    | 5,578,582 | 406 | SRX1939207        | from the NCBI DB |
| FSIS1700607  | SLV of ST32H | <i>stx1a</i>       | USA | foods    |              |      |          |           |     |                   |                  |

Supplemental Table S3. Phage genomes used for constructing the in-house phage DB used in this study.

| accession number                                                             | strain or host                                   | phage name                                                                      |
|------------------------------------------------------------------------------|--------------------------------------------------|---------------------------------------------------------------------------------|
| <b>Prophages identified in this study</b>                                    |                                                  |                                                                                 |
| AP019703                                                                     | <i>Escherichia coli</i> O145:H28 str. 10942      | 10942_P01-10942_P17                                                             |
| AP019706                                                                     | <i>Escherichia coli</i> O145:H28 str. 112648     | 122715_P01-122715_P16                                                           |
| AP019708                                                                     | <i>Escherichia coli</i> O145:H28 str. 122715     | 122715_P01-122715_P16                                                           |
| CP027763                                                                     | <i>Escherichia coli</i> O145:H28 str. 2015C-3125 | 2015C-3125_P01-2015C-3125_P18                                                   |
| CP028379                                                                     | <i>Escherichia coli</i> O145:H28 str. RM9872     | RM9872_P01-RM9872_P16                                                           |
| CP027362                                                                     | <i>Escherichia coli</i> O145:H28 str. 95-3192    | 95-3192_P01-95-3192_P16                                                         |
| CP006027                                                                     | <i>Escherichia coli</i> O145:H28 str. RM13514    | RM13514_P01-RM13514_P20                                                         |
| CP006262                                                                     | <i>Escherichia coli</i> O145:H28 str. RM13516    | RM13516_P01-RM13516_P12                                                         |
| <b>Prophages accurately annotated in the genomes we previously sequenced</b> |                                                  |                                                                                 |
| BA000007                                                                     | <i>Escherichia coli</i> O157:H7 str. Sakai       | Sp1-Sp18                                                                        |
| AP010953                                                                     | <i>Escherichia coli</i> O26:H11 str. 11368       | ECO26_P01-ECO26_P21                                                             |
| AP010958                                                                     | <i>Escherichia coli</i> O103:H2 str. 12009       | ECO103_P01-ECO103_P15                                                           |
| AP010960                                                                     | <i>Escherichia coli</i> O111:H- str. 11128       | ECO111_P01-ECO111_P17                                                           |
| AB426048-64                                                                  | <i>Escherichia coli</i> O111:H- str. B171-8      | GEI0.58, 0.81, 1.03, 1.18, 1.31, 1.79, 1.94, 1.98, 2.04, 2.21, 2.43, 2.69, 4.26 |
| FM180568                                                                     | <i>Escherichia coli</i> O127:H6 str. E2348/69    | PP_1-PP_13                                                                      |
| AP013063                                                                     | <i>Serratia marcescens</i> str. SM39             | PP1-PP7                                                                         |
| HG326223                                                                     | <i>Serratia marcescens</i> str. Db11             | PP1-PP2                                                                         |
| <b>Phage genomes in public DB</b>                                            |                                                  |                                                                                 |
| NC_000866.4                                                                  | <i>Escherichia coli</i>                          | Enterobacteria phage T4 (T4)                                                    |
| NC_000902.1                                                                  | <i>Escherichia coli</i> O157:H7                  | Enterobacteria phage VT2-Sakai (Bacteriophage VT2-Sa)                           |
| NC_000924.1                                                                  | <i>Escherichia coli</i> O157:H7 EDL933           | Enterobacteria phage 933W                                                       |
| NC_000929.1                                                                  | <i>Escherichia coli</i>                          | Enterobacteria phage Mu                                                         |
| NC_001271.1                                                                  | <i>Yersinia enterocolitica</i> (type O:3)        | Yersinia phage phiYεO3-12                                                       |
| NC_001330.1                                                                  | <i>Escherichia coli</i>                          | Enterobacteria phage alpha3                                                     |
| NC_001332.1                                                                  | <i>Escherichia coli</i>                          | Enterobacteria phage I2-2                                                       |
| NC_001416.1                                                                  | <i>Escherichia coli</i>                          | Enterobacteria phage lambda                                                     |
| NC_001417.2                                                                  | <i>Escherichia coli</i>                          | Enterobacteria phage MS2                                                        |
| NC_001420.2                                                                  | <i>Escherichia coli</i>                          | Enterobacteria phage G4 sensu lato                                              |
| NC_001421.2                                                                  | <i>Escherichia coli</i>                          | Enterobacteria phage PRD1                                                       |
| NC_001422.1                                                                  | <i>Escherichia coli</i>                          | Enterobacteria phage phiX174 sensu lato                                         |
| NC_001426.1                                                                  | <i>Escherichia coli</i>                          | Enterobacteria phage BZ13                                                       |
| NC_001604.1                                                                  | <i>Escherichia coli</i>                          | Enterobacteria phage T7 (T7)                                                    |
| NC_001609.1                                                                  | <i>Escherichia coli</i>                          | Enterobacteria phage P4                                                         |
| NC_001890.1                                                                  | <i>Escherichia coli</i>                          | Enterobacteria phage Qbeta                                                      |
| NC_001895.1                                                                  | <i>Escherichia coli</i>                          | Enterobacteria phage P2                                                         |
| NC_001901.1                                                                  | <i>Escherichia coli</i>                          | Enterobacteria phage N15                                                        |
| NC_001954.1                                                                  | <i>Escherichia coli</i>                          | Enterobacteria phage Ifl                                                        |
| NC_002014.1                                                                  | <i>Escherichia coli</i>                          | Enterobacteria phage Ike                                                        |
| NC_002166.1                                                                  | <i>Escherichia coli</i>                          | Enterobacteria phage HK022                                                      |
| NC_002167.1                                                                  | <i>Escherichia coli</i>                          | Enterobacteria phage HK97                                                       |
| NC_002371.2                                                                  | <i>Salmonella enterica</i> serovar typhimurium   | Enterobacteria phage P22                                                        |
| NC_002730.1                                                                  | <i>Escherichia coli</i>                          | Salmonella phage HK620                                                          |
| NC_003287.2                                                                  | <i>Escherichia coli</i>                          | Enterobacteria phage M13                                                        |
| NC_003298.1                                                                  | <i>Escherichia coli</i>                          | Enterobacteria phage T3                                                         |
| NC_003356.1                                                                  | <i>Escherichia coli</i>                          | Enterobacteria phage phiP27                                                     |
| NC_003444.1                                                                  | <i>Shigella flexneri</i>                         | Enterobacteria phage Sfv                                                        |
| NC_003525.1                                                                  | <i>Escherichia coli</i> O157:H7                  | Stx2 converting phage I (Stx2 converting bacteriophage I)                       |
| NC_004301.1                                                                  | <i>Escherichia coli</i>                          | Enterobacteria phage F1 sensu lato                                              |
| NC_004313.1                                                                  | <i>Salmonella</i> Typhimurium                    | Salmonella phage ST64B                                                          |
| NC_004348.1                                                                  | <i>Salmonella</i> Typhimurium                    | Salmonella phage ST64T                                                          |
| NC_004745.1                                                                  | <i>Yersinia pestis</i>                           | Yersinia phage L-413C                                                           |
| NC_004775.1                                                                  | <i>Salmonella enterica</i>                       | Salmonella phage epsilon15                                                      |
| NC_004777.1                                                                  | <i>Yersinia pestis</i>                           | Yersinia phage phiA1122                                                         |
| NC_004813.1                                                                  | <i>Escherichia coli</i>                          | Enterobacteria phage BP-4795                                                    |
| NC_004831.2                                                                  | <i>Salmonella</i> Typhimurium                    | Enterobacteria phage SP6                                                        |
| NC_004913.2                                                                  | <i>Escherichia coli</i> O157:H7                  | Escherichia Stx1 converting bacteriophage (Stx1 converting                      |
| NC_004914.2                                                                  | <i>Escherichia coli</i> O157:H7                  | Stx2 converting phage II (Stx2 converting bacteriophage II)                     |
| NC_004928.1                                                                  | <i>Escherichia coli</i>                          | Enterobacteria phage RB69 (RB69)                                                |
| NC_005066.1                                                                  | <i>Escherichia coli</i>                          | Enterobacteria phage RB49 (RB49)                                                |
| NC_005069.1                                                                  | <i>Yersinia enterocolitica</i>                   | Yersinia phage PY54                                                             |
| NC_005282.1                                                                  | <i>Salmonella</i>                                | Salmonella phage Felix01                                                        |
| NC_005340.1                                                                  | <i>Salmonella</i>                                | Enterobacteria phage PsP3                                                       |
| NC_005344.1                                                                  | <i>Shigella flexneri</i>                         | Shigella phage Sf6                                                              |
| NC_005833.1                                                                  | <i>Escherichia coli</i>                          | Enterobacteria phage T1                                                         |
| NC_005841.1                                                                  | <i>Salmonella</i> typhimurium DT104              | Enterobacteria phage ST104                                                      |
| NC_005856.1                                                                  | <i>Escherichia coli</i>                          | Enterobacteria phage P1                                                         |
| NC_005857.1                                                                  | <i>Klebsiella oxytoca</i>                        | Klebsiella phage phiK02                                                         |
| NC_005859.1                                                                  | <i>Escherichia coli</i>                          | Enterobacteria phage T5                                                         |
| NC_006940.2                                                                  | unknown                                          | Salmonella phage SS3c                                                           |
| NC_006949.1                                                                  | <i>Salmonella</i> typhimurium                    | Enterobacteria phage ES18                                                       |
| NC_007023.1                                                                  | Enterobacteriaceae                               | Enterobacteria phage RB43 (RB43)                                                |
| NC_007291.1                                                                  | <i>Escherichia coli</i> O157:H7                  | Enterobacteria phage JK06                                                       |
| NC_007456.1                                                                  | <i>Escherichia coli</i>                          | Enterobacteria phage K1F                                                        |
| NC_007603.1                                                                  | <i>Escherichia coli</i>                          | Enterobacteria phage RTP                                                        |
| NC_007637.1                                                                  | <i>Escherichia coli</i>                          | Enterobacteria phage K1E                                                        |
| NC_007804.2                                                                  | <i>Escherichia coli</i> O157:H7                  | Escherichia phage phiV10                                                        |
| NC_007817.1                                                                  | <i>Escherichia coli</i>                          | Enterobacteria phage ID2 Moscow/ID/2001                                         |
| NC_007821.1                                                                  | <i>Escherichia coli</i>                          | Enterobacteria phage WA13 sensu lato                                            |
| NC_007856.1                                                                  | <i>Escherichia coli</i>                          | Enterobacteria phage ID18 sensu lato                                            |
| NC_008152.1                                                                  | <i>Escherichia coli</i>                          | Enterobacteria phage K1-5                                                       |
| NC_008464.1                                                                  | <i>Escherichia coli</i>                          | Stx2-converting phage 86 (Stx2-converting bacteriophage 8)                      |
| NC_008515.1                                                                  | Enterobacteriaceae                               | Enterobacteria phage RB32                                                       |
| NC_008694.1                                                                  | <i>Yersinia pestis</i>                           | Yersinia phage Berlin                                                           |
| NC_008720.1                                                                  | <i>Escherichia coli</i>                          | Escherichia phage N4                                                            |
| NC_009014.1                                                                  | <i>Erwinia amylovora</i> NCPPB 595               | Enterobacteria phage Era103                                                     |
| NC_009232.1                                                                  | <i>Salmonella</i> enteritidis                    | Salmonella phage SETP3                                                          |
| NC_009514.1                                                                  | <i>Escherichia coli</i>                          | Enterobacteria phage odtI (Bacteriophage odtI)                                  |
| NC_009540.1                                                                  | <i>Escherichia coli</i> B                        | Enterobacteria phage TLS                                                        |
| NC_009821.1                                                                  | <i>Escherichia coli</i> K-12 (F+)                | Enterobacteria phage PhiI                                                       |
| NC_010105.1                                                                  | <i>Escherichia coli</i>                          | Enterobacteria phage JS98                                                       |
| NC_010106.1                                                                  | <i>Escherichia coli</i>                          | Enterobacteria phage phiEcoM-GJ1                                                |
| NC_010237.1                                                                  | <i>Escherichia coli</i> O157:H7 str. Min27       | Enterobacteria phage Min27                                                      |
| NC_010324.1                                                                  | <i>Escherichia coli</i>                          | Enterobacteria phage Phioco32                                                   |
| NC_010391.1                                                                  | <i>Salmonella</i> typhimurium LT2                | Salmonella phage Fels-1                                                         |
| NC_010392.1                                                                  | <i>Salmonella</i> typhimurium LT2                | Phage Gifsy-1                                                                   |
| NC_010393.1                                                                  | <i>Salmonella</i> typhimurium LT2                | Phage Gifsy-2                                                                   |
| NC_010463.1                                                                  | <i>Salmonella</i> typhimurium LT2                | Salmonella phage Fels-2                                                         |
| NC_010495.1                                                                  | <i>Salmonella</i> enterica                       | Salmonella phage Vi II-E1                                                       |
| NC_010583.1                                                                  | <i>Escherichia coli</i>                          | Enterobacteria phage EPS7                                                       |
| NC_010807.1                                                                  | <i>Salmonella</i> spp.                           | Salmonella phage phiSG-JL2                                                      |



|             |                                                                  |                                          |
|-------------|------------------------------------------------------------------|------------------------------------------|
| NC_011038.1 | <i>Yersinia pestis</i>                                           | Yersinia phage Yepc2                     |
| NC_011040.1 | <i>Escherichia coli</i>                                          | Enterobacteria phage BA14                |
| NC_011041.1 | <i>Escherichia coli</i>                                          | Escherichia phage rv5                    |
| NC_011042.1 | <i>Escherichia coli</i>                                          | Enterobacteria phage EcoDS1              |
| NC_011043.1 | <i>Klebsiella</i> sp. 390                                        | Klebsiella phage K11                     |
| NC_011045.1 | <i>Escherichia coli</i>                                          | Enterobacteria phage 13a                 |
| NC_011085.2 | <i>Morganella morganii</i>                                       | Morganella phage MmP1                    |
| NC_011356.1 | <i>Escherichia coli</i> O157:H7                                  | Enterobacteria phage YYZ-2008            |
| NC_011357.1 | <i>Escherichia coli</i> O157:H7                                  | Stx2-converting phage 1717               |
| NC_011534.1 | <i>Kluyvera cryocrescens</i>                                     | Kluyvera phage Kvp1                      |
| NC_011802.1 | <i>Salmonella</i> sp.                                            | Salmonella phage SE1                     |
| NC_011811.1 | <i>Erwinia amylovora</i>                                         | Erwinia phage phiEa21-4                  |
| NC_011976.1 | <i>Salmonella enterica</i> subsp. <i>enterica</i> serovar Anatum | Salmonella phage epsilon34               |
| NC_012223.1 | <i>Escherichia coli</i>                                          | Enterobacteria phage SSL-2009a           |
| NC_012635.1 | unknown                                                          | Enterobacteria phage RB51                |
| NC_012638.1 | unknown                                                          | Enterobacteria phage RB14                |
| NC_012740.1 | <i>Escherichia coli</i> K12                                      | Enterobacteria phage JSE                 |
| NC_012741.1 | <i>Escherichia coli</i> K12                                      | Enterobacteria phage JS10                |
| NC_012749.1 | <i>Escherichia coli</i> O157:H7                                  | Escherichia phage wV8                    |
| NC_012868.1 | <i>Escherichia coli</i> strain K12                               | Enterobacteria phage St-1                |
| NC_013059.1 | <i>Salmonella enterica</i> subsp. <i>enterica</i> serovar Anatum | Salmonella phage g341c                   |
| NC_013594.1 | <i>Escherichia coli</i>                                          | Escherichia phage D108                   |
| NC_013647.1 | <i>Klebsiella pneumoniae</i>                                     | Klebsiella phage KP32                    |
| NC_013649.2 | <i>Klebsiella pneumoniae</i>                                     | Klebsiella phage KP34                    |
| NC_013693.1 | <i>Shigella boydii</i>                                           | Shigella phage phiSboM-AG3               |
| NC_014036.1 | <i>Klebsiella pneumoniae</i>                                     | Klebsiella phage KP15                    |
| NC_014260.1 | <i>Escherichia coli</i> strain 8099                              | Enterobacteria phage IME08               |
| NC_014467.1 | <i>Escherichia coli</i>                                          | Enterobacteria phage RB16                |
| NC_014595.1 | <i>Shigella sonnei</i>                                           | Shigella phage SP18                      |
| NC_014662.1 | <i>Escherichia coli</i>                                          | Enterobacteria phage CC31                |
| NC_014792.1 | <i>Escherichia coli</i>                                          | Enterobacteria phage vB_EcoM-VR7         |
| NC_014900.1 | <i>Salmonella enterica</i> serovar Typhimurium                   | Salmonella phage ST160                   |
| NC_015249.1 | <i>Escherichia coli</i>                                          | Enterobacteria phage 285P                |
| NC_015269.1 | <i>Salmonella Typhimurium</i> ; <i>Escherichia coli</i>          | Enterobacteria phage SPC35               |
| NC_015271.1 | <i>Salmonella enterica</i> subsp. <i>enterica</i> serovar Typhi  | Salmonella phage Vi06                    |
| NC_015292.1 | unknown                                                          | Erwinia phage phiEa104                   |
| NC_015295.1 | unknown                                                          | Erwinia phage phiEi88                    |
| NC_015296.1 | <i>Salmonella enterica</i> subsp. <i>enterica</i> serovar Typhi  | Salmonella phage Vi01                    |
| NC_015456.1 | <i>Shigella flexneri</i>                                         | Shigella phage Shf1                      |
| NC_015457.1 | <i>Shigella flexneri</i>                                         | Shigella phage Shf2                      |
| NC_015585.1 | <i>Pantoea agglomerans</i>                                       | Pantoea phage LIMZero                    |
| NC_015719.1 | unknown                                                          | Enterobacteria phage K30                 |
| NC_015938.1 | unknown                                                          | Salmonella phage 7-11                    |
| NC_016071.1 | <i>Salmonella enteritidis</i>                                    | Salmonella phage PVP-SE1                 |
| NC_016073.1 | <i>Salmonella</i> sp. and <i>Escherichia coli</i> O157           | Salmonella phage SFP10                   |
| NC_016158.1 | <i>Escherichia coli</i>                                          | Escherichia phage HK639                  |
| NC_016160.1 | <i>Escherichia coli</i> K-12                                     | Escherichia phage HK75                   |
| NC_016163.1 | <i>Yersinia enterocolitica</i>                                   | Yersinia phage phiR1-37                  |
| NC_016566.1 | <i>Shigella sonnei</i>                                           | Shigella phage EP23                      |
| NC_016570.1 | <i>Escherichia coli</i> ; O157:H7; NCTC 12900                    | Escherichia phage vB_EcoM_CBA120         |
| NC_016761.1 | pathogenic <i>Salmonella</i> bacterium                           | Salmonella phage SPN1S                   |
| NC_016763.1 | <i>Salmonella enterica</i> serovar Enteritidis                   | Salmonella phage SE2                     |
| NC_016767.1 | <i>Erwinia pyrrhiae</i>                                          | Erwinia phage PEP14                      |
| NC_017969.1 | <i>Escherichia coli</i>                                          | Escherichia phage vB_EcoS_AKFV33         |
| NC_017974.1 | <i>Cronobacter sakazakii</i>                                     | Cronobacter phage CR3                    |
| NC_017985.1 | <i>Salmonella</i> sp.                                            | Salmonella phage SPN9CC                  |
| NC_018275.1 | <i>Salmonella</i> serovar Haardt                                 | Salmonella phage vB_SemP_Emek            |
| NC_018279.1 | <i>Salmonella</i> serovar Winston                                | Salmonella phage vB_SoS_Oslo             |
| NC_018454.1 | UV-induced <i>Cronobacter sakazakii</i> ES15                     | Cronobacter phage phiES15                |
| NC_018832.1 | <i>Providencia stuartii</i> isolate MRSN 2154                    | Providencia phage Redjac                 |
| NC_018835.1 | <i>Escherichia coli</i> DE172                                    | Enterobacteria phage NJ01                |
| NC_018837.1 | unknown                                                          | Pectobacterium phage My1                 |
| NC_018843.1 | unknown                                                          | Salmonella phage SSU5                    |
| NC_018846.1 | <i>Escherichia coli</i> CB13374, serotype O104:H4                | Escherichia phage P13374                 |
| NC_018854.1 | <i>Escherichia coli</i> KBP21                                    | Escherichia phage KBNP21                 |
| NC_018855.1 | <i>Escherichia coli</i> DM01                                     | Enterobacteria phage HX01                |
| NC_018859.1 | <i>Escherichia coli</i> KBP135                                   | Escherichia phage KBNP135                |
| NC_019398.1 | <i>Cronobacter sakazakii</i>                                     | Cronobacter phage vB_CsaM_GAP161         |
| NC_019399.1 | <i>Escherichia coli</i>                                          | Enterobacteria phage vB_EcoM_ACG-C40     |
| NC_019400.1 | <i>Cronobacter sakazakii</i>                                     | Cronobacter phage vB_CsaM_GAP31          |
| NC_019401.1 | <i>Cronobacter sakazakii</i>                                     | Cronobacter phage vB_CsaM_GAP32          |
| NC_019402.1 | <i>Cronobacter sakazakii</i>                                     | Cronobacter phage vB_CsaP_GAP52          |
| NC_019403.1 | <i>Escherichia coli</i>                                          | Enterobacteria phage vB_EcoP_ACG-C91     |
| NC_019404.1 | <i>Escherichia coli</i>                                          | Enterobacteria phage vB_EcoS_ACG-M12     |
| NC_019417.1 | <i>Salmonella</i> sp.                                            | Salmonella phage SPN19                   |
| NC_019419.1 | <i>Escherichia coli</i> O157:H7                                  | Enterobacteria phage JL1                 |
| NC_019420.1 | unknown                                                          | Edwardsiella phage KF-1                  |
| NC_019423.1 | <i>Escherichia coli</i>                                          | Enterobacter phage IME11                 |
| NC_019442.1 | unknown                                                          | Escherichia phage TL-2011c               |
| NC_019445.1 | unknown                                                          | Escherichia phage TL-2011b               |
| NC_019452.1 | <i>Escherichia coli</i> O157:H7                                  | Escherichia phage Phax1                  |
| NC_019454.1 | <i>Pantoea agglomerans</i>                                       | Pantoea phage LIMelight                  |
| NC_019485.1 | <i>Enterobacter cloacae</i>                                      | Enterobacter phage EcP1                  |
| NC_019488.1 | unknown                                                          | Salmonella phage RE-2010                 |
| NC_019500.1 | <i>Escherichia coli</i> O78.A                                    | Enterobacteria phage Bp7                 |
| NC_019501.1 | <i>Escherichia coli</i>                                          | Enterobacteria phage IME10               |
| NC_019503.1 | <i>Escherichia coli</i>                                          | Enterobacteria phage ime09               |
| NC_019504.1 | <i>Erwinia amylovora</i>                                         | Erwinia phage vB_EamM-Y2                 |
| NC_019505.1 | <i>Escherichia coli</i>                                          | Escherichia phage wV7                    |
| NC_019509.1 | <i>Cronobacter sakazakii</i> ATCC29544                           | Cronobacter phage ESP2949-1              |
| NC_019510.1 | <i>Erwinia amylovora</i>                                         | Erwinia phage vB_EamP-L1                 |
| NC_019514.1 | <i>Erwinia amylovora</i>                                         | Erwinia phage vB_EamP-S6                 |
| NC_019517.1 | <i>Escherichia coli</i>                                          | Enterobacteria phage vB_EcoM-FV3         |
| NC_019520.1 | <i>Escherichia</i> sp.                                           | Escherichia phage phiKT                  |
| NC_019522.1 | <i>Pectobacterium carotovorum</i>                                | Pectobacterium phage ZF40 (vB_PcaM-ZF40) |
| NC_019524.1 | <i>Enterobacter cancerogenus</i>                                 | Enterobacter phage Enc34                 |
| NC_019526.1 | <i>Klebsiella</i> sp.                                            | Enterobacteria phage vB_KleM-RaK2        |
| NC_019530.1 | <i>Salmonella typhimurium</i>                                    | Salmonella phage PhiSH19                 |
| NC_019539.1 | unknown                                                          | Salmonella phage vB_SenS-Ent1            |
| NC_019542.1 | unknown                                                          | Pectobacterium phage PP1                 |
| NC_019545.1 | <i>Salmonella typhimurium</i>                                    | Salmonella phage SPN3UB                  |
| NC_019704.1 | <i>Escherichia coli</i>                                          | Enterobacteria phage mEp237              |
| NC_019705.1 | <i>Escherichia coli</i>                                          | Enterobacteria phage mEpX2               |
| NC_019706.1 | <i>Escherichia coli</i>                                          | Enterobacteria phage mEp043 c-1          |

|             |                                                                  |                                            |
|-------------|------------------------------------------------------------------|--------------------------------------------|
| NC_019707.1 | <i>Escherichia coli</i> J53 (plasmid RIP69)                      | Enterobacteria phage M                     |
| NC_019708.1 | <i>Escherichia coli</i>                                          | Enterobacteria phage mEp235                |
| NC_019709.1 | <i>Escherichia coli</i>                                          | Enterobacteria phage mEpX1                 |
| NC_019710.1 | <i>Escherichia coli</i>                                          | Enterobacteria phage HK140                 |
| NC_019711.1 | <i>Escherichia coli</i>                                          | Enterobacteria phage HK629                 |
| NC_019714.1 | <i>Escherichia coli</i>                                          | Enterobacteria phage HK446                 |
| NC_019715.1 | <i>Escherichia coli</i>                                          | Enterobacterial phage mEp234               |
| NC_019716.1 | <i>Escherichia coli</i>                                          | Enterobacteria phage mEp460                |
| NC_019717.1 | <i>Escherichia coli</i>                                          | Enterobacteria phage HK225                 |
| NC_019718.1 | <i>Escherichia coli</i>                                          | Enterobacteria phage vB_EcoS_Rogue1        |
| NC_019719.1 | <i>Escherichia coli</i>                                          | Enterobacteria phage HK633                 |
| NC_019720.1 | <i>Escherichia coli</i>                                          | Enterobacterial phage mEp213               |
| NC_019721.1 | <i>Escherichia coli</i>                                          | Enterobacterial phage mEp390               |
| NC_019723.1 | <i>Escherichia coli</i>                                          | Enterobacteria phage HK630                 |
| NC_019724.1 | <i>Escherichia coli</i>                                          | Enterobacteria phage HK578                 |
| NC_019725.1 | unknown                                                          | Escherichia phage ADB-2                    |
| NC_019767.1 | <i>Escherichia coli</i>                                          | Enterobacteria phage HK544                 |
| NC_019768.1 | <i>Escherichia coli</i>                                          | Enterobacteria phage HK106                 |
| NC_019769.1 | <i>Escherichia coli</i>                                          | Enterobacteria phage HK542                 |
| NC_019781.1 | <i>Klebsiella pneumoniae</i>                                     | Klebsiella phage KP36                      |
| NC_019909.1 | <i>Yersinia enterocolitica</i>                                   | Yersinia phage phiR1-RT                    |
| NC_019910.1 | unknown                                                          | Salmonella phage SKML-39                   |
| NC_019911.1 | <i>Yersinia enterocolitica</i>                                   | Yersinia phage phi80-18                    |
| NC_019919.1 | <i>Yersinia enterocolitica</i>                                   | Yersinia phage phiR201                     |
| NC_019920.1 | Enterobacteriaceae                                               | Enterobacteria phage C-1 INW-2012          |
| NC_019922.1 | Enterobacteriaceae                                               | Enterobacteria phage Hgall                 |
| NC_019926.1 | unknown                                                          | Erwinia phage phiEa100                     |
| NC_019927.1 | <i>Cronobacter sakazakii</i>                                     | Cronobacter phage ENT47670                 |
| NC_019929.1 | <i>Erwinia amylovora</i>                                         | Erwinia phage phiEaH2                      |
| NC_019932.1 | <i>Erwinia amylovora</i>                                         | Erwinia phage ENT90                        |
| NC_019934.1 | <i>Cronobacter sakazakii</i>                                     | Cronobacter phage ENT39118                 |
| NC_020083.1 | <i>Serratia</i> sp.                                              | Serratia phage phiMAM1                     |
| KC333879.1  | <i>Escherichia coli</i>                                          | Enterobacteria phage phiJLA23              |
| KC295538.1  | <i>Escherichia coli</i> O157                                     | Escherichia phage PBECO 4                  |
| KC237308.1  | <i>Escherichia coli</i> C                                        | Enterobacteria phage ID204 Moscow/ID       |
| KC206276.1  | <i>Escherichia coli</i> O78:K80                                  | Escherichia phage EC1                      |
| JQ015307.1  | <i>Pectobacterium atrosepticum</i> SCR11043                      | Pectobacterium phage phiTE                 |
| JF461087.1  | <i>Salmonella enterica</i>                                       | Salmonella phage FO1a                      |
| JX000007.1  | <i>Yersinia pestis</i>                                           | Yersinia phage R                           |
| JX866719.1  | <i>Klebsiella pneumoniae</i> JDM777                              | Klebsiella phage JD001                     |
| KC107834.1  | <i>Cronobacter sakazakii</i> strain 51329                        | Cronobacter phage vB_CskP_GAP227           |
| AB767244.1  | unknown                                                          | Edwardsiella phage MSW-3                   |
| JX871397.1  | <i>Escherichia coli</i>                                          | Enterobacteria phage phi80 (Lula)          |
| AB757801.1  | unknown                                                          | Edwardsiella phage IW-1                    |
| HQ918180.1  | <i>Klebsiella pneumoniae</i>                                     | Klebsiella phage KP27                      |
| HE858210.2  | unknown                                                          | Enterobacteria phage RB43 (RB43)           |
| HE981739.1  | unknown                                                          | Enterobacteria phage RB43 (RB43)           |
| JX913857.1  | <i>Escherichia coli</i> C                                        | synthetic Enterobacteria phage phiX174.1f  |
| JX561091.1  | <i>Escherichia coli</i>                                          | Escherichia phage phiAPEC8                 |
| JX181825.1  | unknown                                                          | Salmonella phage STML-198                  |
| JX560968.1  | <i>Escherichia coli</i> O157:H7                                  | Escherichia phage EC6                      |
| JX181824.1  | unknown                                                          | Salmonella phage SSE-121                   |
| JQ966307.1  | <i>Escherichia coli</i>                                          | Enterobacterio phage MS2                   |
| JX412914.1  | <i>Escherichia coli</i>                                          | Enterobacteria phage M13                   |
| AP011113.1  | <i>Escherichia coli</i> O157:H7                                  | Enterobacteria phage AR1                   |
| HM208303.1  | <i>Escherichia coli</i> O157:H7                                  | Stx2 converting phage vB_EcoP_24B          |
| HE956711.1  | <i>Yersinia pestis</i>                                           | Yersinia phage phiD1                       |
| HE956707.1  | <i>Yersinia enterocolitica</i>                                   | Yersinia phage phiR8-01                    |
| JX128258.1  | <i>Escherichia coli</i> O157:H7                                  | Escherichia phage ECML-117                 |
| JX202565.1  | unknown                                                          | Salmonella phage wksI3                     |
| JX128259.1  | <i>Escherichia coli</i> O157:H7                                  | Escherichia phage ECML-134                 |
| JX128257.1  | <i>Escherichia coli</i> O157:H7                                  | Escherichia phage ECML-4                   |
| GU903191.1  | <i>Escherichia coli</i>                                          | Escherichia phage vB_EcoM_ECO1230-10       |
| FR775895.2  | <i>Escherichia coli</i> K92                                      | Enterobacteria phage phi92                 |
| HQ665011.1  | <i>Escherichia coli</i>                                          | Escherichia phage vB_EcoS_AKFV33           |
| HE600015.1  | <i>Dickeya solani</i>                                            | Dickeya phage vB_DsoM_LIMEstone1           |
| JN641803.1  | unknown                                                          | Salmonella phage SPN3US                    |
| JF314845.1  | <i>Cronobacter sakazakii</i>                                     | Cronobacter phage ES2                      |
| JN600960.1  | <i>Escherichia coli</i>                                          | Enterobacteria phage IME10                 |
| JF770475.1  | <i>Escherichia coli</i> CFT073                                   | Escherichia phage phiEB49                  |
| HQ728263.1  | <i>Erwinia amylovora</i>                                         | Erwinia phage vB_EamM-M7                   |
| HQ110083.1  | <i>Cronobacter sakazakii</i>                                     | Cronobacter phage ESS1-2                   |
| HQ406778.1  | <i>Salmonella Typhimurium</i> ; <i>Escherichia coli</i>          | Enterobacteria phage SPC35                 |
| FJ000341.1  | <i>Salmonella enterica</i> subsp. <i>enterica</i> serovar Anatum | Salmonella phage g341c                     |
| AM084414.1  | unknown                                                          | Enterobacteria phage K1F                   |
| FQ482084.1  | unknown                                                          | Erwinia phage phiEa1H                      |
| FM180578.1  | <i>E. coli</i> O157:H7 strain CB2851                             | Enterobacteria phage 2851                  |
| AM084415.1  | unknown                                                          | Enterobacteria phage K1E                   |
| AP005154.1  | <i>Escherichia coli</i> O157:H7 Morioka V526                     | Stx2 converting phage II                   |
| HQ333270.1  | <i>Yersinia pestis</i>                                           | Yersinia phage Y ep-phi                    |
| GU196280.1  | <i>Escherichia coli</i> O18:K1:H7                                | Escherichia phage K1-ind(2)                |
| GU196281.1  | <i>Escherichia coli</i> O18:K1:H7                                | Escherichia phage K1-ind(3)                |
| GU196277.1  | <i>Escherichia coli</i> O18:K1:H7                                | Escherichia phage K1-dep(4)                |
| GU196279.1  | <i>Escherichia coli</i> O18:K1:H7                                | Escherichia phage K1-ind(1)                |
| GU196278.1  | <i>Escherichia coli</i> O18:K1:H7                                | Escherichia phage K1-dep(1)                |
| AF503408.1  | unknown                                                          | Enterobacteria phage P7                    |
| HM137666.1  | <i>Escherichia coli</i>                                          | Enterobacteria phage T4T                   |
| AY598820.1  | unknown                                                          | VCSM13 interference-resistant helper phage |
| CP000711.1  | <i>Escherichia coli</i> RS218                                    | Enterobacteria phage CUS-3                 |
| EU078592.1  | <i>Escherichia coli</i> BL21(DE3)                                | Enterobacteria phage DE3                   |
| AY848688.1  | unknown                                                          | Enterobacteria phage PR772                 |
| AY848686.1  | unknown                                                          | Enterobacteria phage PR4                   |
| AY848684.1  | unknown                                                          | Enterobacteria phage L17                   |
| AY848687.1  | unknown                                                          | Enterobacteria phage PR5                   |
| AY848685.1  | unknown                                                          | Enterobacteria phage PR3                   |
| J02451.1    | unknown                                                          | Enterobacteria phage fd                    |
| AP005153.1  | <i>Escherichia coli</i> O157:H7 Morioka V526                     | Escherichia Stx1 converting bacteriophage  |
| AB255436.1  | <i>Escherichia coli</i> O86:H-, strain DIJ1                      | Stx2-converting phage 86                   |
| AP004402.1  | <i>Escherichia coli</i> O157:H7 Okayama O-27                     | Stx2 converting phage I                    |
| AB102868.1  | <i>Salmonella typhimurium</i> DT104                              | Enterobacteria phage ST104                 |
| DQ085810.2  | unknown                                                          | Enterobacteria phage alpha3                |
| AY135486.1  | unknown                                                          | Enterobacteria phage PsP3                  |
| NC_000867.1 | <i>Pseudoalteromonas</i>                                         | Pseudoalteromonas phage PM2                |
| NC_001396.1 | <i>Xanthomonas campestris</i>                                    | Xanthomonas phage Cf1c                     |

|             |                                                        |                                                                   |
|-------------|--------------------------------------------------------|-------------------------------------------------------------------|
| NC_001697.1 | <i>Haemophilus influenzae</i>                          | Haemophilus phage HP1                                             |
| NC_001956.1 | <i>Vibrio cholerae</i> O139                            | Vibrio phage fs2 (Vibrio cholerae filamentous bacteriophage fs-2) |
| NC_002362.1 | <i>Vibrio parahaemolyticus</i> O3:K6                   | Vibrio phage Vfo3K6 (Bacteriophage Vfo3K6)                        |
| NC_002363.1 | <i>Vibrio parahaemolyticus</i>                         | Vibrio phage Vfo4K68 (Bacteriophage Vfo4K68)                      |
| NC_002700.2 | <i>Acinetobacter</i> genomosp. 16                      | Acinetobacter phage AP205                                         |
| NC_003313.1 | <i>Vibrio cholerae</i> O139                            | Vibrio phage K139                                                 |
| NC_003315.1 | <i>Haemophilus influenzae</i>                          | Haemophilus phage HP2                                             |
| NC_003327.2 | <i>Vibrio cholerae</i> O139                            | Vibrio phage VSK                                                  |
| NC_003907.2 | <i>Vibrio parahaemolyticus</i>                         | Vibrio phage VpV262                                               |
| NC_004306.1 | <i>Vibrio cholerae</i> O139                            | Vibrio phage fs1 (Vibrio cholerae O139 fs1 phage)                 |
| NC_004456.1 | <i>Vibrio harveyi</i>                                  | Vibrio phage VHML                                                 |
| NC_004736.1 | <i>Vibrio cholerae</i>                                 | Vibrio phage VGJphi                                               |
| NC_004902.1 | <i>Xanthomonas oryzae</i>                              | Xanthomonas phage Xp10                                            |
| NC_005083.2 | <i>Vibrio parahaemolyticus</i>                         | Vibrio phage KVP40                                                |
| NC_005135.1 | <i>Aeromonas salmonicida</i>                           | Aeromonas phage 44RR2.8t                                          |
| NC_005260.1 | <i>Aeromonas hydrophila</i>                            | Aeromonas phage Aeh1 (Aeh1)                                       |
| NC_005879.1 | <i>Vibrio cholerae</i>                                 | Vibrio phage VP2                                                  |
| NC_005891.1 | <i>Vibrio cholerae</i>                                 | Vibrio phage VP5                                                  |
| NC_005948.1 | <i>Vibrio parahaemolyticus</i>                         | Vibrio phage Vf33 (Bacteriophage Vf33)                            |
| NC_005949.1 | <i>Vibrio parahaemolyticus</i>                         | Vibrio phage Vf12 (Bacteriophage Vf12)                            |
| NC_006294.1 | <i>Vibrio cholerae</i>                                 | Vibrio phage KSF-1phi                                             |
| NC_006953.1 | <i>Listonella pelagia</i>                              | Listonella phage phiHSIC                                          |
| NC_007022.1 | <i>Aeromonas salmonicida</i>                           | Aeromonas phage 31                                                |
| NC_007024.1 | <i>Xanthomonas campestris</i> pv. <i>pelargonii</i>    | Xanthomonas phage Xp15                                            |
| NC_007149.1 | <i>Vibrio</i>                                          | Vibriophage VP4                                                   |
| NC_007189.1 | <i>Stenotrophomonas maltophilia</i>                    | Stenotrophomonas phage phiSMA9                                    |
| NC_007709.1 | <i>Xanthomonas oryzae</i>                              | Xanthomonas phage OP1                                             |
| NC_007710.1 | <i>Xanthomonas oryzae</i>                              | Xanthomonas phage OP2                                             |
| NC_007902.1 | <i>Sodalis glossinidius</i> str. <i>morsitans</i>      | Sodalis phage phiSG1                                              |
| NC_008193.1 | <i>Pasteurella multocida</i>                           | Pasteurella phage F108                                            |
| NC_008201.1 | <i>Mannheimia haemolytica</i>                          | Mannheimia phage phiMHaA1                                         |
| NC_008208.1 | <i>Aeromonas salmonicida</i>                           | Aeromonas phage 25                                                |
| NC_009016.1 | <i>Vibrio parahaemolyticus</i>                         | Vibrio phage VP882                                                |
| NC_009542.2 | <i>Aeromonas media</i>                                 | Aeromonas phage phiO18P                                           |
| NC_009543.1 | <i>Xanthomonas oryzae</i>                              | Xanthomonas phage Xop411                                          |
| NC_009990.1 | <i>Thalassomonas loyana</i> LMG 22536                  | Thalassomonas phage BA3                                           |
| NC_010275.1 | <i>Vibrio cholerae</i>                                 | Vibrio phage kappa                                                |
| NC_010342.1 | <i>Halomonas aquamarina</i>                            | Halomonas phage phiHAP-1                                          |
| NC_011589.1 | <i>Stenotrophomonas maltophilia</i>                    | Stenotrophomonas phage S1                                         |
| NC_012662.1 | <i>Vibrio parahaemolyticus</i> PMC57.5                 | Vibrio phage VpP93                                                |
| NC_012742.1 | <i>Xanthomonas campestris</i> pv. <i>campestris</i>    | Xanthomonas phage phiL7                                           |
| NC_012757.1 | <i>Vibrio cholerae</i>                                 | Vibrio phage VEJphi                                               |
| NC_013597.1 | <i>Aggregatibacter actinomycetemcomitans</i> D11S-1    | Aggregatibacter phage S1249                                       |
| NC_013599.1 | <i>Xylella fastidiosa</i>                              | Xylella phage Xfas53                                              |
| NC_013600.1 | <i>Sodalis glossinidius</i>                            | Sodalis phage SO-1                                                |
| NC_013651.1 | unknown                                                | Vibrio phage N4                                                   |
| NC_014635.1 | <i>Aeromonas salmonicida</i>                           | Aeromonas phage phiAS4                                            |
| NC_014636.1 | <i>Aeromonas salmonicida</i>                           | Aeromonas phage phiAS5                                            |
| NC_014660.1 | unknown                                                | Acinetobacter phage Ac42                                          |
| NC_014661.1 | <i>Acinetobacter johnsonii</i>                         | Acinetobacter phage Acj61                                         |
| NC_014663.1 | <i>Acinetobacter johnsonii</i>                         | Acinetobacter phage Acj9                                          |
| NC_015157.1 | <i>Vibrio cholerae</i>                                 | Vibrio phage ICP1                                                 |
| NC_015158.1 | <i>Vibrio cholerae</i>                                 | Vibrio phage ICP2                                                 |
| NC_015159.1 | <i>Vibrio cholerae</i>                                 | Vibrio phage ICP3                                                 |
| NC_015208.1 | unknown                                                | Pseudomonas phage phi15                                           |
| NC_015209.1 | <i>Vibrio cholerae</i> KMN002                          | Vibrio phage CTX                                                  |
| NC_015250.1 | <i>Acinetobacter johnsonii</i>                         | Acinetobacter phage 133                                           |
| NC_015251.1 | <i>Aeromonas salmonicida</i>                           | Aeromonas phage 65                                                |
| NC_015272.1 | unknown                                                | Pseudomonas phage KPP10                                           |
| NC_015293.1 | <i>Pseudoalteromonas</i> sp. H105                      | Pseudoalteromonas phage H105/1                                    |
| NC_015586.1 | <i>Stenotrophomonas maltophilia</i>                    | Stenotrophomonas phage phiSHP2                                    |
| NC_015933.1 | unknown                                                | Escherichia phage vB_EcoP_G7C                                     |
| NC_016162.1 | <i>Vibrio cholerae</i> str. 10E09PW02                  | Vibrio phage VCY-phi                                              |
| NC_016567.1 | <i>Vibrio</i> sp. SWAT-3                               | Vibrio phage SIO-2                                                |
| NC_017981.1 | <i>Xanthomonas vesicatoria</i>                         | Xanthomonas phage vB_XveM_DIBBI                                   |
| NC_017984.1 | <i>Acinetobacter baumannii</i>                         | Acinetobacter bacteriophage AP22                                  |
| NC_018087.1 | unknown                                                | Acinetobacter phage ZZ1                                           |
| NC_018088.1 | <i>Colwellia psychrerythraea</i> strain 34H            | Colwellia phage 9A                                                |
| NC_018269.1 | <i>Marinomonas</i> sp. IMCC12026                       | Marinomonas phage P12026                                          |
| NC_019416.1 | <i>Stenotrophomonas maltophilia</i>                    | Stenotrophomonas phage IME15                                      |
| NC_019455.1 | <i>Haemophilus parasuis</i> 34086b                     | Haemophilus phage SuMu                                            |
| NC_019457.1 | <i>Vibrio cholerae</i> ElTor                           | Vibrio phage CP-T1 (vB_VchM-CP-T1)                                |
| NC_019518.1 | <i>Vibrio cholerae</i>                                 | Vibrio phage vB_VchM-138                                          |
| NC_019527.1 | <i>Aeromonas salmonicida</i>                           | Aeromonas phage vB_AsaM-56 (phage 56-Popoff)                      |
| NC_019528.1 | <i>Aeromonas salmonicida</i> subsp. <i>salmonicida</i> | Aeromonas phage phiAS7                                            |
| NC_019529.1 | <i>Vibrio parahaemolyticus</i> ATCC 33844              | Vibrio phage pVp-1                                                |
| NC_019538.1 | <i>Aeromonas hydrophila</i>                            | Aeromonas phage CC2                                               |
| NC_019540.1 | <i>Salinivibrio costicola</i>                          | Salinivibrio phage CW02                                           |
| NC_019541.1 | <i>Acinetobacter baumannii</i> YMC/09/02/B1251         | Acinetobacter phage Bphi-B1251                                    |
| NC_019543.1 | <i>Aeromonas salmonicida</i>                           | Aeromonas phage Aes508                                            |
| NC_019713.1 | <i>Vibrio parahaemolyticus</i>                         | Vibrio phage vB_VpaS_MAR10                                        |
| NC_019722.1 | <i>Vibrio parahaemolyticus</i>                         | Vibrio phage vB_VpaM_MAR                                          |
| NC_019923.1 | unknown                                                | Pseudomonas phage AF                                              |
| NC_019933.1 | <i>Xanthomonas citri</i>                               | Xanthomonas phage CP1                                             |
| KC311669.1  | carbapenem-resistant <i>Acinetobacter baumannii</i>    | Acinetobacter phage AB3                                           |
| AF399011.1  | unknown                                                | Pseudomonas phage phiKZ                                           |
| JX434033.1  | unknown                                                | Pseudomonas phage JBD88a                                          |
| JX434031.1  | unknown                                                | Pseudomonas phage JBD24                                           |
| JX434032.1  | unknown                                                | Pseudomonas phage JBD30                                           |
| JX434030.1  | unknown                                                | Pseudomonas phage JBD5                                            |
| JN811560.1  | unknown                                                | Pseudomonas phage JBD26                                           |
| AB720064.1  | <i>Xanthomonas citri</i>                               | Xanthomonas citri phage CP2                                       |
| JX560521.1  | <i>Acinetobacter soli</i> KZ-1                         | Acinetobacter phage phiAC-1                                       |
| JX976549.1  | <i>Acinetobacter baumannii</i>                         | Acinetobacter phage IME-AB2                                       |
| JX495041.1  | unknown                                                | Pseudomonas phage JBD18                                           |
| JX495042.1  | unknown                                                | Pseudomonas phage JBD25                                           |
| JF270478.1  | <i>Psychrobacter</i> sp. MV2                           | Psychrobacter phage Psymv2                                        |
| JX306041.1  | <i>Stenotrophomonas maltophilia</i>                    | Stenotrophomonas phage IME13                                      |
| HM368260.1  | <i>Acinetobacter baumannii</i>                         | Acinetobacter phage AB1                                           |
| JQ801337.1  | <i>Vibrio vulnificus</i>                               | Vibrio phage VvAW1                                                |
| JN377895.1  | <i>Aeromonas</i> sp.                                   | Aeromonas phage Aes012                                            |
| JQ692107.1  | <i>Vibrio vulnificus</i>                               | Vibrio phage SSP002                                               |
| JQ780163.1  | <i>Vibrio cholerae</i>                                 | Vibrio phage VP3                                                  |
| JF713456.1  | <i>Vibrio harveyi</i> 1114GL                           | Vibrio phage 1                                                    |

|             |                                                     |                                                                 |
|-------------|-----------------------------------------------------|-----------------------------------------------------------------|
| AB572858.1  | <i>Vibrio cholerae</i> O139 strain ND1              | Vibrio phage ND1-fs1                                            |
| JN808773.1  | unknown                                             | Pseudomonas phage F_HA0480sp/Pa1651                             |
| JF712866.1  | <i>Vibrio cholerae</i> O1 Classic E8021             | Vibrio phage phiVC8                                             |
| HQ186308.1  | <i>Acinetobacter baumannii</i> M68316               | Acinetobacter phage phiAB1                                      |
| GU396103.1  | <i>Aeromonas salmonicida</i>                        | Aeromonas phage PX29                                            |
| DQ785801.1  | <i>Sodalis glossiniidius</i>                        | Sodalis phage phiSG1 (Sodalis plasmid pSOG3)                    |
| NC_001331.1 | <i>Pseudomonas aeruginosa</i>                       | Pseudomonas phage Pfl                                           |
| NC_001418.1 | <i>Pseudomonas aeruginosa</i>                       | Pseudomonas phage Pf3                                           |
| NC_001628.1 | <i>Pseudomonas aeruginosa</i>                       | Pseudomonas phage PP7                                           |
| NC_002484.1 | <i>Pseudomonas aeruginosa</i>                       | Pseudomonas phage D3                                            |
| NC_003278.1 | <i>Pseudomonas aeruginosa</i>                       | Pseudomonas phage phiCTX (Pseudomonas aeruginosa phage phi CTX) |
| NC_004466.2 | <i>Pseudomonas aeruginosa</i>                       | Pseudomonas phage PaP3                                          |
| NC_004629.1 | <i>Pseudomonas aeruginosa</i>                       | Pseudomonas phage phiKZ                                         |
| NC_004665.1 | <i>Pseudomonas putida</i>                           | Pseudomonas phage gh-1 (gh-1)                                   |
| NC_005045.1 | <i>Pseudomonas aeruginosa</i>                       | Enterobacteria phage phiKMV                                     |
| NC_005178.1 | <i>Pseudomonas aeruginosa</i>                       | Pseudomonas phage D3112                                         |
| NC_005884.1 | <i>Pseudomonas aeruginosa</i>                       | Pseudomonas phage PaP2                                          |
| NC_006548.1 | <i>Pseudomonas aeruginosa</i> PAO1 (ATCC 15692)     | Pseudomonas phage B3                                            |
| NC_006552.1 | <i>Pseudomonas aeruginosa</i>                       | Pseudomonas phage F116                                          |
| NC_007623.1 | <i>Pseudomonas aeruginosa</i>                       | Pseudomonas phage EL                                            |
| NC_007805.1 | <i>Pseudomonas aeruginosa</i>                       | Pseudomonas phage F10                                           |
| NC_007806.1 | <i>Pseudomonas aeruginosa</i>                       | Pseudomonas phage 73                                            |
| NC_007807.1 | <i>Pseudomonas aeruginosa</i>                       | Pseudomonas phage 119X                                          |
| NC_007808.1 | <i>Pseudomonas aeruginosa</i>                       | Pseudomonas phage PA11                                          |
| NC_007809.1 | <i>Pseudomonas aeruginosa</i>                       | Pseudomonas phage M6                                            |
| NC_007810.1 | <i>Pseudomonas aeruginosa</i>                       | Pseudomonas phage F8                                            |
| NC_008294.1 | <i>Pseudomonas</i>                                  | Pseudomonas phage PRR1 (PRR1)                                   |
| NC_008717.1 | <i>Pseudomonas aeruginosa</i>                       | Pseudomonas phage DMS3                                          |
| NC_009818.1 | <i>Pseudomonas aeruginosa</i> UCBPP-PA14            | Pseudomonas phage MP22                                          |
| NC_009935.1 | <i>Pseudomonas aeruginosa</i>                       | Pseudomonas phage LKD16                                         |
| NC_009936.1 | <i>Pseudomonas aeruginosa</i>                       | Pseudomonas phage LKA1                                          |
| NC_010116.1 | <i>Pseudomonas aeruginosa</i>                       | Pseudomonas phage YuA                                           |
| NC_010325.1 | <i>Pseudomonas aeruginosa</i>                       | Pseudomonas phage LUZ24                                         |
| NC_010326.1 | <i>Pseudomonas aeruginosa</i> PAO1                  | Pseudomonas phage LUZ19                                         |
| NC_010821.1 | <i>Pseudomonas chlororaphis</i>                     | Pseudomonas phage 201phi2-1                                     |
| NC_011105.1 | <i>Pseudomonas aeruginosa</i>                       | Pseudomonas phage PT5                                           |
| NC_011107.1 | <i>Pseudomonas aeruginosa</i>                       | Pseudomonas phage PT2                                           |
| NC_011165.1 | <i>Pseudomonas aeruginosa</i>                       | Pseudomonas phage LBL3                                          |
| NC_011166.1 | <i>Pseudomonas aeruginosa</i>                       | Pseudomonas phage LMA2                                          |
| NC_011373.1 | <i>Pseudomonas aeruginosa</i>                       | Pseudomonas phage PAJU2                                         |
| NC_011611.1 | <i>Pseudomonas aeruginosa</i> PA14                  | Pseudomonas phage MP38                                          |
| NC_011613.1 | <i>Pseudomonas aeruginosa</i> PA14                  | Pseudomonas phage MP29                                          |
| NC_011703.1 | <i>Pseudomonas</i> spp.                             | Pseudomonas phage 14-1                                          |
| NC_011756.1 | <i>Pseudomonas aeruginosa</i>                       | Pseudomonas phage SN                                            |
| NC_011810.1 | <i>Pseudomonas aeruginosa</i>                       | Pseudomonas phage PB1                                           |
| NC_012418.1 | <i>Pseudomonas aeruginosa</i>                       | Pseudomonas phage phiKF77                                       |
| NC_013638.1 | <i>Pseudomonas fluorescens</i> SBW25                | Pseudomonas phage phi-2                                         |
| NC_013691.1 | <i>Pseudomonas aeruginosa</i>                       | Pseudomonas phage LUZ7                                          |
| NC_013692.1 | <i>Pseudomonas aeruginosa</i>                       | Pseudomonas phage LIT1                                          |
| NC_015264.1 | <i>Pseudomonas fluorescens</i>                      | Pseudomonas phage phiBB-PF7A                                    |
| NC_015294.1 | <i>Pseudomonas aeruginosa</i> PAK                   | Pseudomonas phage PAK_P1                                        |
| NC_016571.1 | <i>Pseudomonas fluorescens</i> Pf1.1                | Pseudomonas phage OBP                                           |
| NC_016762.1 | <i>Pseudomonas aeruginosa</i>                       | Pseudomonas phage phi297                                        |
| NC_016764.1 | <i>Pseudomonas tolaasii</i> LMG 2342                | Pseudomonas phage Bf7                                           |
| NC_016765.1 | <i>Pseudomonas aeruginosa</i>                       | Pseudomonas phage vB_PaeS_PMG1                                  |
| NC_016764.1 | <i>Pseudomonas aeruginosa</i>                       | Pseudomonas phage JG024                                         |
| NC_017864.1 | <i>Pseudomonas aeruginosa</i> PA25                  | Pseudomonas phage vB_Pae-Kakheti25                              |
| NC_017865.1 | <i>Pseudomonas aeruginosa</i> PA32                  | Pseudomonas phage vB_Pae-TbilisiM32                             |
| NC_017971.2 | <i>Pseudomonas putida</i> PpG1                      | Pseudomonas phage tf                                            |
| NC_017972.1 | <i>Pseudomonas putida</i> var. Manila               | Pseudomonas phage Lu11                                          |
| NC_018274.1 | <i>Pseudomonas aeruginosa</i> PA14                  | Pseudomonas phage MP42                                          |
| NC_018282.1 | <i>Pseudomonas aeruginosa</i> PAO1                  | Pseudomonas phage MP1412                                        |
| NC_018850.1 | <i>Pseudomonas fluorescens</i>                      | Pseudomonas phage UVF-P2                                        |
| NC_019450.1 | <i>Pseudomonas aeruginosa</i>                       | Pseudomonas phage JG004                                         |
| NC_019451.1 | <i>Pseudomonas aeruginosa</i>                       | Pseudomonas phage NH-4                                          |
| NC_019813.1 | <i>Pseudomonas aeruginosa</i>                       | Pseudomonas phage vB_PaeP_p2-10_Or1                             |
| NC_019913.1 | <i>Pseudomonas aeruginosa</i> PA1                   | Pseudomonas phage PaP1                                          |
| NC_019918.1 | <i>Pseudomonas aeruginosa</i> C2-10                 | Pseudomonas phage vB_PaeM_C2-10_Ab1                             |
| NC_019935.1 | <i>Pseudomonas aeruginosa</i>                       | Pseudomonas phage KPP12                                         |
| KC262634.1  | <i>Pseudomonas aeruginosa</i> HIM-6                 | Pseudomonas phage H66                                           |
| JX403939.1  | <i>Pseudomonas aeruginosa</i> YMC/01/01/P52         | Pseudomonas phage YMC/01/01/P52_PAE_BP                          |
| HE983844.1  | <i>Pseudomonas aeruginosa</i>                       | Pseudomonas phage vB_PaeP_C1-14_Or                              |
| JX194238.1  | <i>Pseudomonas aeruginosa</i>                       | Pseudomonas phage PA26                                          |
| JQ067084.1  | <i>Pseudomonas aeruginosa</i>                       | Pseudomonas phage PaMx25                                        |
| JQ067085.1  | <i>Pseudomonas aeruginosa</i>                       | Pseudomonas phage PaMx73                                        |
| JQ067083.1  | <i>Pseudomonas aeruginosa</i>                       | Pseudomonas phage PaMx13                                        |
| JQ307387.1  | <i>Pseudomonas aeruginosa</i> PA25                  | Pseudomonas phage vB_Pae-Kakheti25                              |
| JN254801.1  | <i>Pseudomonas aeruginosa</i>                       | Pseudomonas phage MR299-2                                       |
| HM624080.1  | <i>Pseudomonas aeruginosa</i>                       | Pseudomonas phage PA1/KOR/2010                                  |
| HQ711985.1  | <i>Pseudomonas aeruginosa</i>                       | Pseudomonas phage vB_PaeS_PMG1                                  |
| JN175269.1  | <i>Pseudomonas tolaasii</i>                         | Pseudomonas phage phi_Pto-bp6g                                  |
| HQ630627.1  | <i>Pseudomonas aeruginosa</i> strain PAO1           | Pseudomonas phage PhiPA3                                        |
| HM173081.1  | <i>Pseudomonas aeruginosa</i>                       | Pseudomonas phage P3_CHA                                        |
| HM173082.1  | <i>Pseudomonas aeruginosa</i>                       | Pseudomonas phage PAK_P3                                        |
| AB008550.1  | <i>Pseudomonas aeruginosa</i> (strain PA158)        | Pseudomonas phage phiCTX                                        |
| NC_003714.1 | <i>Pseudomonas syringae</i> pv. <i>phaseolicola</i> | Pseudomonas phage phi6                                          |
| NC_004173.1 | <i>Pseudomonas syringae</i>                         | Pseudomonas phage phi12                                         |
| NC_004170.1 | <i>Pseudomonas syringae</i>                         | Pseudomonas phage phi13                                         |
| NC_012091.2 | <i>Pseudomonas syringae</i>                         | Pseudomonas phage phi2954                                       |
| NC_003299.1 | <i>Pseudomonas syringae</i>                         | Pseudomonas phage phi8                                          |

Supplemental Table S4. The IS elements identified in the seven completely sequenced O145:H28 genomes.

| Family      | ST, Strain ID<br>Strain name | Copy numbers on chromosome/plasmid in |                    |                    |                                   |                    |                     |                       |
|-------------|------------------------------|---------------------------------------|--------------------|--------------------|-----------------------------------|--------------------|---------------------|-----------------------|
|             |                              | ST32, C1<br>10942                     | ST32, C2<br>RM9872 | ST32, C3<br>122715 | ST32, C4<br>95-3192* <sup>1</sup> | ST32, C5<br>112648 | ST32, C6<br>RM13514 | ST6130, C7<br>RM13516 |
| IS1         | IS1F                         | 2/0                                   | 2/0                | 2/0                | 0                                 | 2/0                | 2/0                 | 2/0                   |
| IS1         | IS1R                         | 0/0                                   | 0/0                | 0/0                | 0                                 | 0/0                | 0/0                 | 1/0                   |
| IS3         | IS2                          | 1/0                                   | 1/0                | 1/0                | 2                                 | 1/0                | 2/0                 | 1/0                   |
| IS3         | IS600                        | 1/4                                   | 1/4                | 1/4                | 1                                 | 1/4                | 9/4                 | 2/0                   |
| IS3         | IS629                        | 37/5                                  | 39/2               | 32/3               | 34                                | 29/2               | 27/5                | 19/3                  |
| IS3         | IS1203/<br>IS1203E           | 3/1                                   | 5/2                | 8/1                | 2                                 | 6/3                | 3/1                 | 0/0                   |
| IS3         | IS911                        | 1/1                                   | 1/1                | 1/1                | 1                                 | 1/1                | 1/1                 | 1/0                   |
| IS3         | ISCfr6                       | 1/0                                   | 2/0                | 1/0                | 1                                 | 1/0                | 1/0                 | 0/2                   |
| IS3         | ISEc16                       | 0/0                                   | 0/0                | 0/0                | 0                                 | 0/0                | 0/0                 | 2/0                   |
| IS3         | ISEc48                       | 0/0                                   | 0/0                | 0/0                | 0                                 | 0/0                | 0/0                 | 0/1                   |
| IS3         | ISKpn37                      | 0/0                                   | 0/0                | 0/0                | 0                                 | 0/0                | 0/0                 | 0/1                   |
| IS4         | IS421                        | 0/1                                   | 0/1                | 0/1                | 0                                 | 0/1                | 0/1                 | 0/0                   |
| IS4         | ISEc13                       | 1/0                                   | 1/0                | 1/0                | 1                                 | 1/0                | 1/0                 | 1/0                   |
| IS4         | ISEc60                       | 0/0                                   | 0/0                | 0/0                | 0                                 | 0/0                | 0/0                 | 1/0                   |
| IS6         | IS15                         | 0/0                                   | 0/0                | 0/0                | 0                                 | 0/0                | 0/1                 | 0/0                   |
| IS6         | IS26                         | 0/1                                   | 0/0                | 0/0                | 0                                 | 0/0                | 0/2                 | 0/0                   |
| IS21        | ISSso4                       | 0/0                                   | 1/0                | 1/0                | 1                                 | 1/0                | 2/0                 | 0/0                   |
| IS30        | IS30                         | 0/0                                   | 0/0                | 0/0                | 0                                 | 0/0                | 0/0                 | 2/0                   |
| IS66        | IS682                        | 1/0                                   | 1/0                | 1/0                | 1                                 | 1/0                | 1/0                 | 1/0                   |
| IS66        | ISCro1                       | 1/0                                   | 1/0                | 1/0                | 1                                 | 1/0                | 2/0                 | 2/0                   |
| IS66        | ISEc8                        | 1/4                                   | 1/4                | 1/4                | 1                                 | 1/4                | 2/3                 | 6/2                   |
| IS66        | ISEc23                       | 1/0                                   | 1/0                | 1/0                | 1                                 | 1/0                | 1/0                 | 7/1                   |
| IS66        | ISEc47                       | 1/1                                   | 1/1                | 1/1                | 1                                 | 1/1                | 2/1                 | 1/0                   |
| IS66        | ISEc49                       | 0/0                                   | 1/0                | 1/0                | 1                                 | 1/0                | 1/0                 | 0/0                   |
| IS66        | ISEc78                       | 1/0                                   | 1/0                | 1/0                | 1                                 | 1/0                | 1/0                 | 2/0                   |
| IS66        | ISEc83                       | 0/4                                   | 1/4                | 1/4                | 1                                 | 1/4                | 1/4                 | 2/0                   |
| IS91        | ISEc84                       | 0/2                                   | 0/2                | 0/2                | 0                                 | 0/2                | 0/2                 | 0/4                   |
| IS91        | ISVsa3                       | 0/0                                   | 0/0                | 0/0                | 0                                 | 0/0                | 0/1                 | 0/0                   |
| IS110       | ISEc20                       | 4/0                                   | 4/0                | 5/0                | 5                                 | 4/0                | 8/0                 | 6/0                   |
| IS200/IS605 | IS200C                       | 0/1                                   | 0/1                | 0/1                | 0                                 | 0/1                | 0/1                 | 0/1                   |
| IS200/IS605 | IS609                        | 2/0                                   | 2/0                | 2/0                | 2                                 | 2/0                | 2/0                 | 2/1                   |
| IS256       | ISEic2                       | 0/0                                   | 0/0                | 0/0                | 0                                 | 0/0                | 0/0                 | 1/0                   |
| ISAs1       | ISEc1                        | 1/0                                   | 1/0                | 1/0                | 1                                 | 1/0                | 1/0                 | 1/0                   |
| ISAs1       | ISEc5                        | 1/0                                   | 1/0                | 1/0                | 1                                 | 1/0                | 1/0                 | 1/0                   |
| ISL3        | ISEc38                       | 1/1                                   | 1/1                | 1/1                | 1                                 | 1/1                | 1/1                 | 1/0                   |
| Total       |                              | 62/26                                 | 70/23              | 66/23              | 61                                | 60/24              | 72/28               | 66/16                 |

\*<sup>1</sup> No plasmid sequences have been deposited.

The copy numbers in C6 or C7 notably different from those of other strains are indicated by red.

Unique IS elements in C7 are indicated by cyan.

Supplemental Table S5. The PPs and IEs of seven completely sequenced O145:H28 strains.

| Integration site      | ST32/B, C1 (strain 10942) |             |             |                                                                  | ST32/C, C2 (strain RM9872) |             |             |                                                                  | ST32/E, C3 (strain 122715) |             |             |                                                                  |      |             |
|-----------------------|---------------------------|-------------|-------------|------------------------------------------------------------------|----------------------------|-------------|-------------|------------------------------------------------------------------|----------------------------|-------------|-------------|------------------------------------------------------------------|------|-------------|
|                       | ID                        | Features    | Length (bp) | Virulence-related genes                                          | ID                         | Features    | Length (bp) | Virulence-related genes                                          | ID                         | Features    | Length (bp) | Virulence-related genes                                          | ID   | Features    |
| <b>PPs</b>            |                           |             |             |                                                                  |                            |             |             |                                                                  |                            |             |             |                                                                  |      |             |
| tRNA ( <i>argU</i> )  | P01                       | lambda-like | 31,700      | <i>bor, lom</i>                                                  | P01                        | lambda-like | 31,700      | <i>bor, lom</i>                                                  | P01                        | lambda-like | 31,494      | <i>bor, lom</i>                                                  | P01  |             |
| <i>ybhC-ybhB</i>      | P02                       | lambda-like | 34,512      | <i>espJ, nleH, cif, sfpA, lom, nleG</i> <sup>*1</sup>            | P02                        | lambda-like | 34,512      | <i>espJ, nleH, cif, sfpA, lom, nleG</i> <sup>*1</sup>            | P02                        | lambda-like | 35,825      | <i>espJ, nleH, cif, sfpA, lom, nleG</i> <sup>*1</sup>            | P02  |             |
| <i>cspD-cspS</i>      |                           |             |             |                                                                  |                            |             |             |                                                                  |                            |             |             |                                                                  |      |             |
| tRNA ( <i>serT</i> )  | P03                       | lambda-like | 28,471      | <i>tccP, lom, espV</i> <sup>*1</sup>                             | P03                        | lambda-like | 48,649      | <i>pchA, tccP, lom, espV</i> <sup>*1</sup>                       | P03                        | lambda-like | 48,117      | <i>pchA, tccP, lom, espV</i> <sup>*1</sup>                       | P03  |             |
| <i>wrbA</i>           |                           |             |             |                                                                  |                            |             |             |                                                                  |                            |             |             |                                                                  | P09  |             |
| <i>potB</i>           | P04                       | lambda-like | 50,598      | <i>espK, espN, espO, espX, lom, nleB</i> <sup>*1</sup>           | P04                        | lambda-like | 50,597      | <i>espK, espN, espO, espX, lom, nleB</i> <sup>*1</sup>           | P04                        | lambda-like | 50,756      | <i>espK, espN, espO, espX, lom, nleB</i> <sup>*1</sup>           | P04  |             |
| <i>roxA-phoQ</i>      | P05                       | untypable   | 11,222      | <i>pchE</i>                                                      | P05                        | untypable   | 11,222      | <i>pchE</i>                                                      | P05                        | untypable   | 11,222      | <i>pchE</i>                                                      | P05  |             |
| <i>ompW</i>           | P06                       | lambda-like | 43,627      | <i>espM, espO, nleG</i> x 2                                      | P06                        | lambda-like | 44,075      | <i>espM, espO, nleG</i> x 2                                      | P06                        | lambda-like | 43,991      | <i>espM, espO, nleG</i> x 2                                      | P06  |             |
| <i>ompW</i>           | P07                       | lambda-like | 45,405      | <i>stx2, nleC, lom</i> , serine protease                         |                            | lambda-like |             |                                                                  |                            |             |             |                                                                  |      |             |
| <i>ttcA</i>           | P08                       | lambda-like | 47,683      | <i>pchB, lom, nleC</i> <sup>*1</sup>                             | P07                        | lambda-like | 55,838      | <i>pchB, lom, nleC</i> <sup>*1</sup>                             | P07                        | lambda-like | 51,230      | <i>pchB, lom, nleC</i> <sup>*1</sup>                             | P07  |             |
| <i>ydjJ</i>           | P09                       | lambda-like | 49,474      | <i>nleC, lom</i>                                                 | P08                        | lambda-like | 50,533      | <i>lom, nleC</i> <sup>*1</sup>                                   | P08                        | lambda-like | 47,354      | <i>pchB, lom, nleC</i> <sup>*1</sup>                             | P08  |             |
| <i>btuC-infA</i>      | P10                       | P2-like     | 36,529      |                                                                  | P09                        | P2-like     | 38,003      |                                                                  |                            |             |             |                                                                  |      |             |
| <i>yecE</i>           | P11                       | lambda-like | 48,649      | <i>stx1, nleC, lom</i>                                           | P10                        | lambda-like | 45,511      | <i>stx2, nleC, lom</i> , serine protease                         |                            |             |             |                                                                  |      |             |
| tRNA ( <i>leuZ</i> )  |                           |             |             |                                                                  |                            |             |             |                                                                  | P09                        | P2-like     | 36,917      |                                                                  |      |             |
| tRNA ( <i>serU</i> )  | P12                       | lambda-like | 46,169      | <i>pchA, nleB, nleH, nleF, lom</i>                               | P11                        | lambda-like | 46,168      | <i>pchA, nleB, nleH, nleF, lom</i>                               | P10                        | lambda-like | 44,680      | <i>nleC, lom</i>                                                 | P10  | lambda-like |
| <i>shcB</i>           |                           |             |             |                                                                  |                            |             |             |                                                                  |                            |             |             |                                                                  |      |             |
| <i>yegQ-yegR</i>      |                           |             |             |                                                                  |                            |             |             |                                                                  |                            |             |             |                                                                  |      |             |
| <i>mtrA</i>           | P13                       | lambda-like | 35,687      | <i>nleA, lom, espV</i> <sup>*1</sup> , <i>nleH</i> <sup>*1</sup> | P12                        | lambda-like | 35,849      | <i>nleA, lom, espV</i> <sup>*1</sup> , <i>nleH</i> <sup>*1</sup> | P11                        | lambda-like | 35,846      | <i>nleA, lom, espV</i> <sup>*1</sup> , <i>nleH</i> <sup>*1</sup> | P11  | lambda-like |
| tRNA ( <i>argW</i> )  |                           |             |             |                                                                  |                            |             |             |                                                                  | P12                        | lambda-like | 62,636      | <i>stx2, lom</i>                                                 |      |             |
| tmRNA ( <i>ssrA</i> ) | P14                       | lambda-like | 10,696      | <i>nleG, ospB, lom</i>                                           | P13                        | lambda-like | 12,006      | <i>nleG, ospB, lom</i>                                           | P13                        | lambda-like | 29,786      | <i>nleG, ospB, lom</i>                                           | P12  | lambda-like |
| <i>mscS</i>           | P15                       | P4-like     | 13,465      |                                                                  | P14                        | P4-like     | 14,681      |                                                                  | P14                        | P4-like     | 13,377      |                                                                  | P13  | P4-like     |
| <i>yicC</i>           |                           |             |             |                                                                  |                            |             |             |                                                                  |                            |             |             |                                                                  | P14  | P4-like     |
| <i>cpxP-fleF</i>      | P16                       | P2-like     | 33,682      |                                                                  | P15                        | P2-like     | 33,465      |                                                                  | P15                        | P2-like     | 33,729      |                                                                  | P15  | P2-like     |
| <i>dusA</i>           |                           |             |             |                                                                  |                            |             |             |                                                                  |                            |             |             |                                                                  |      |             |
| <i>prfC</i>           | P17                       | lambda-like | 29,908      | <i>lom</i>                                                       | P16                        | lambda-like | 29,908      | <i>lom</i>                                                       | P16                        | lambda-like | 29,907      | <i>lom</i>                                                       | P16  |             |
| <b>IEs</b>            |                           |             |             |                                                                  |                            |             |             |                                                                  |                            |             |             |                                                                  |      |             |
| tRNA ( <i>serX</i> )  | IE01                      | SpLE1-like  | 82,020      | <i>pchD, aidA-I, iha, ureA-G, terA-F, W, Z</i>                   | IE01                       | SpLE1-like  | 82,017      | <i>pchD, aidA-I, iha, ureA-G, terA-F, W, Z</i>                   | IE01                       | SpLE1-like  | 80,129      | <i>pchD, aidA-I, iha, ureA-G, terA-F, W, Z</i>                   | IE02 | SpLE1-like  |
| tRNA ( <i>leuZ</i> )  | IE02                      |             | 20,386      |                                                                  | IE02                       |             | 21,706      |                                                                  | IE02                       |             | 20,312      |                                                                  | IE01 |             |
| tRNA ( <i>asnT</i> )  | IE03                      |             | 13,717      |                                                                  | IE03                       |             | 13,717      |                                                                  | IE03                       |             | 13,717      |                                                                  | IE03 |             |
| tRNA ( <i>pheV</i> )  | IE04                      |             | 21,908      |                                                                  | IE04                       |             | 22,143      |                                                                  | IE04                       |             | 22,912      |                                                                  | IE04 |             |
| tRNA ( <i>ileX</i> )  |                           |             |             |                                                                  |                            |             |             |                                                                  |                            |             |             |                                                                  |      |             |
| tRNA ( <i>selC</i> )  | IE05                      | LEE         | 46,833      | T3SS machinery, <i>espB, espF, espG, espH, espZ, map, tir</i>    | IE05                       | LEE         | 47,117      | T3SS machinery, <i>espB, espF, espG, espH, espZ, map, tir</i>    | IE05                       | LEE         | 46,977      | T3SS machinery, <i>espB, espF, espG, espH, espZ, map, tir</i>    | IE05 | LEE         |
| tRNA ( <i>pheU</i> )  | IE06                      | SpLE3-like  | 12,900      | <i>espL, nleB, nleE</i>                                          | IE06                       | SpLE3-like  | 42,067      | <i>espL, nleB, nleE, aidA-I</i>                                  | IE06                       | SpLE3-like  | 47,716      | <i>espL, nleB, nleE, aidA-I</i>                                  | IE06 | SpLE3-like  |
| tRNA ( <i>leuX</i> )  |                           |             |             |                                                                  |                            |             |             |                                                                  |                            |             |             |                                                                  |      |             |

<sup>\*1</sup> Pseudogene<sup>\*2</sup> Re-analyzed in this study

| ST32/F, C4 (strain 95-3192) |                                                                   |      |             | ST32/F, C5 (strain 112648) |                                                               |      |             | ST32/H, C6 (strain RM13514) <sup>*2</sup> |                                                               |      |             | ST6130, C7 (strain RM13516) <sup>*2</sup> |                                                               |  |  |
|-----------------------------|-------------------------------------------------------------------|------|-------------|----------------------------|---------------------------------------------------------------|------|-------------|-------------------------------------------|---------------------------------------------------------------|------|-------------|-------------------------------------------|---------------------------------------------------------------|--|--|
| Length (bp)                 | Virulence-related genes                                           | ID   | Features    | Length (bp)                | Virulence-related genes                                       | ID   | Features    | Length (bp)                               | Virulence-related genes                                       | ID   | Features    | Length (bp)                               | Virulence-related genes                                       |  |  |
| 31,698                      | <i>bor, lom</i>                                                   | P01  | lambda-like | 31,700                     | <i>bor, lom</i>                                               | P01  | lambda-like | 29,802                                    | <i>bor, lom</i>                                               |      |             |                                           |                                                               |  |  |
| 34,509                      | <i>espJ, nleH, sfpA, lom, cij<sup>*1</sup>, nleG<sup>*1</sup></i> | P02  | lambda-like | 34,511                     | <i>espJ, nleH, cij, sfpA, lom, nleG<sup>*1</sup></i>          | P02  | lambda-like | 35,778                                    | <i>espJ, nleH, cij, sfpA, lom, nleG<sup>*1</sup></i>          | P01  | lambda-like | 43,182                                    | <i>pchA, espJ, nleH, cij, sfpA, lom, nleG<sup>*1</sup></i>    |  |  |
|                             |                                                                   | P03  | P4-like     | 9,547                      |                                                               | P03  | P4-like     | 11,142                                    |                                                               |      |             |                                           |                                                               |  |  |
| 49,139                      | <i>pchA, nleB, nleH, nleF, espV<sup>*1</sup></i>                  | P04  | lambda-like | 47,357                     | <i>pchA, tccP, lom, espV<sup>*1</sup></i>                     | P04  | lambda-like | 51,815                                    | <i>pchA, tccP, lom, espV<sup>*1</sup></i>                     | P02  | lambda-like | 48,928                                    | <i>pchA, tccP, lom, espV<sup>*1</sup></i>                     |  |  |
| 64,449                      | <i>stx2, bor, lom</i>                                             | P05  | lambda-like | 49,855                     | <i>stx1, nleC, lom</i>                                        |      |             |                                           |                                                               |      |             |                                           |                                                               |  |  |
| 50,589                      | <i>espK, espN, espO, espX, lom, nleB<sup>*1</sup></i>             | P06  | lambda-like | 50,760                     | <i>espK, espN, espO, espX, lom, nleB<sup>*1</sup></i>         | P05  | lambda-like | 49,788                                    | <i>espK, espN, espO, espX, lom, nleB<sup>*1</sup></i>         | P03  | lambda-like | 44,962                                    | <i>espK, espN, espO, espX, lom, nleB<sup>*1</sup></i>         |  |  |
| 11,222                      | <i>pchE</i>                                                       | P07  | untypable   | 11,222                     | <i>pchE</i>                                                   | P06  | untypable   | 11,222                                    | <i>pchE</i>                                                   | P04  | untypable   | 11,221                                    | <i>pchE</i>                                                   |  |  |
| 44,081                      | <i>espM, espO, nleG x 2</i>                                       | P08  | lambda-like | 44,064                     | <i>espM, espO, nleG x 2</i>                                   | P07  | lambda-like | 42,634                                    | <i>espM, espO, nleG x 2</i>                                   | P05  | lambda-like | 45,709                                    | <i>espM, espO, nleG x 2</i>                                   |  |  |
|                             |                                                                   | P09  | lambda-like | 44,286                     | <i>stx2, nleC, lom, serine protease</i>                       |      |             |                                           |                                                               |      |             |                                           |                                                               |  |  |
| 53,229                      | <i>pchB, lom, nleC<sup>*1</sup></i>                               | P10  | lambda-like | 50,603                     | <i>nleC, lom</i>                                              | P08  | lambda-like | 48,923                                    | <i>pchB, lom</i>                                              |      |             |                                           |                                                               |  |  |
| 49,832                      | <i>nleC, lom</i>                                                  | P11  | lambda-like | 48,336                     | <i>pchB, lom, nleC<sup>*1</sup></i>                           | P09  | lambda-like | 46,660                                    | <i>lom, nleC<sup>*1</sup></i>                                 | P06  | lambda-like | 47,714                                    | <i>pchB, nleC, lom</i>                                        |  |  |
|                             |                                                                   |      |             |                            |                                                               |      |             |                                           |                                                               |      |             |                                           |                                                               |  |  |
|                             |                                                                   | P12  | lambda-like | 44,286                     | <i>stx2, nleC, lom, serine protease</i>                       |      |             |                                           |                                                               | P07  | lambda-like | 47,309                                    | <i>stx2, nleC, lom, serine protease</i>                       |  |  |
|                             |                                                                   | P13  | P2-like     | 37,323                     |                                                               | P10  | P2-like     | 25,115                                    |                                                               |      |             |                                           |                                                               |  |  |
| 51,865                      | <i>pchA, tccP, lom</i>                                            | P14  | lambda-like | 52,467                     | <i>pchA, nleB, nleH, nleF, lom</i>                            | P11  | lambda-like | 50,390                                    | <i>pchA, nleB, nleH, nleF, lom</i>                            | P08  | lambda-like | 48,964                                    | <i>pchA, nleB, nleH, nleF, lom</i>                            |  |  |
|                             |                                                                   |      |             |                            |                                                               | P12  | lambda-like | 45,388                                    |                                                               |      |             |                                           |                                                               |  |  |
|                             |                                                                   |      |             |                            |                                                               |      |             |                                           |                                                               | P09  | P2-like     | 35,789                                    |                                                               |  |  |
| 35,846                      | <i>nleA, lom, espV<sup>*1</sup>, nleH<sup>*1</sup></i>            | P15  | lambda-like | 34,532                     | <i>nleA, lom, espV<sup>*1</sup>, nleH<sup>*1</sup></i>        | P13  | lambda-like | 35,805                                    | <i>espV, nleA, lom, nleH<sup>*1</sup></i>                     | P10  | lambda-like | 57,297                                    | <i>espV, nleA, nleG x 2, lom, ospB<sup>*1</sup></i>           |  |  |
|                             |                                                                   |      |             |                            |                                                               | P14  | lambda-like | 62,692                                    | <i>stx2, lom</i>                                              |      |             |                                           |                                                               |  |  |
| 10,696                      | <i>nleG, ospB, lom</i>                                            | P16  | lambda-like | 40,894                     | <i>nleG, ospB, lom</i>                                        | P15  | lambda-like | 36,519                                    | <i>nleG, ospB, lom</i>                                        | P11  | lambda-like | 42,129                                    | <i>nleG, ospB, lom</i>                                        |  |  |
| 13,367                      |                                                                   | P17  | P4-like     | 13,368                     |                                                               | P16  | P4-like     | 13,368                                    |                                                               |      |             |                                           |                                                               |  |  |
| 15,955                      |                                                                   |      |             |                            |                                                               | P17  | P4-like     | 11,945                                    |                                                               |      |             |                                           |                                                               |  |  |
| 33,729                      |                                                                   | P18  | P2-like     | 33,729                     |                                                               | P18  | P2-like     | 33,729                                    |                                                               |      |             |                                           |                                                               |  |  |
|                             |                                                                   |      |             |                            |                                                               | P19  | lambda-like | 46,659                                    | <i>pchA, nleG, lom, (ospB)</i>                                |      |             |                                           |                                                               |  |  |
| 29,907                      | <i>lom</i>                                                        |      |             |                            |                                                               | P20  | lambda-like | 29,907                                    | <i>lom</i>                                                    | P12  | lambda-like | 50,395                                    | <i>lom</i>                                                    |  |  |
|                             |                                                                   |      |             |                            |                                                               |      |             |                                           |                                                               |      |             |                                           |                                                               |  |  |
| 81,851                      | <i>pchD, aidA-I, iha, ureA-F, terA-F, W, Z</i>                    | IE01 | SpLE1-like  | 82,018                     | <i>pchD, aidA-I, iha, ureA-G, terA-F, W, Z</i>                | IE01 | SpLE1-like  | 82,235                                    | <i>iha, ureA-G, terA-F, W, Z</i>                              | IE01 | SpLE1-like  | 96,165                                    | <i>iha, ureA-G, terA-F, W, Z</i>                              |  |  |
| 20,856                      |                                                                   | IE02 |             | 19,073                     |                                                               | IE02 |             | 13,341                                    |                                                               | IE02 |             | 14,663                                    |                                                               |  |  |
| 13,716                      |                                                                   | IE03 |             | 13,717                     |                                                               | IE03 |             | 27,920                                    |                                                               | IE03 |             | 13,717                                    |                                                               |  |  |
| 21,951                      |                                                                   | IE04 |             | 23,452                     |                                                               | IE04 |             | 12,470                                    |                                                               | IE04 |             | 32,050                                    |                                                               |  |  |
|                             |                                                                   |      |             |                            |                                                               | IE05 | SpLE1-like  | 65,392                                    | <i>espP, ureA-G, terA-F, W, Z</i>                             |      |             |                                           |                                                               |  |  |
| 46,973                      | T3SS machinery, <i>espB, espF, espG, espH, espZ, map, tir</i>     | IE05 | LEE         | 46,977                     | T3SS machinery, <i>espB, espF, espG, espH, espZ, map, tir</i> | IE06 | LEE         | 46,695                                    | T3SS machinery, <i>espB, espF, espG, espH, espZ, map, tir</i> | IE05 | LEE         | 47,827                                    | T3SS machinery, <i>espB, espF, espG, espH, espZ, map, tir</i> |  |  |
| 44,925                      | <i>espL, nleB, nleE, aidA-I</i>                                   | IE06 | SpLE3-like  | 46,414                     | <i>espL, nleB, nleE, aidA-I</i>                               | IE07 | SpLE3-like  | 47,676                                    | <i>espL, nleB, nleE, aidA-I</i>                               | IE06 |             | 66,609                                    | <i>aidA-I</i>                                                 |  |  |
|                             |                                                                   |      |             |                            |                                                               |      |             |                                           |                                                               | IE07 | SpLE3-like  | 52,073                                    | <i>espL, nleB, nleE, aidA-I</i>                               |  |  |

Supplemental Table S6. T3SS effectors and their copy numbers of the seven completely sequenced O145:H28 strains

| T3SS effectors     | Strains (ST, clade) |                   |                   |                    |                   |                                  |                                    |
|--------------------|---------------------|-------------------|-------------------|--------------------|-------------------|----------------------------------|------------------------------------|
|                    | 10942 (ST32, C1)    | RM9872 (ST32, C2) | 122715 (ST32, C3) | 95-3192 (ST32, C4) | 112648 (ST32, C5) | RM13514 (ST32, C6) <sup>*1</sup> | RM13516 (ST6130, C7) <sup>*1</sup> |
| EspB <sup>*2</sup> | 1                   | 1                 | 1                 | 1                  | 1                 | 1                                | 1                                  |
| EspF <sup>*2</sup> | 1                   | 1                 | 1                 | 1                  | 1                 | 1                                | 1                                  |
| EspG <sup>*2</sup> | 1                   | 1                 | 1                 | 1                  | 1                 | 1                                | 1                                  |
| EspH <sup>*2</sup> | 1                   | 1                 | 1                 | 1                  | 1                 | 1                                | 1                                  |
| EspZ <sup>*2</sup> | 1                   | 1                 | 1                 | 1                  | 1                 | 1                                | 1                                  |
| Map <sup>*2</sup>  | 1                   | 1                 | 1                 | 1                  | 1                 | 1                                | 1                                  |
| Tir <sup>*2</sup>  | 1                   | 1                 | 1                 | 1                  | 1                 | 1                                | 1                                  |
| EspJ               | 1                   | 1                 | 1                 | 1                  | 1                 | 1                                | 1                                  |
| EspK               | 1                   | 1                 | 1                 | 1                  | 1                 | 1                                | 1                                  |
| EspL               | 1                   | 1                 | 1                 | 1                  | 1                 | 1                                | 1                                  |
| EspM               | 1                   | 1                 | 1                 | 1                  | 1                 | 1                                | 1                                  |
| EspN               | 1                   | 1                 | 1                 | 1                  | 1                 | 1                                | 1                                  |
| EspO               | 2                   | 2                 | 2                 | 2                  | 2                 | 2                                | 2                                  |
| EspV               | 2 (2)               | 2 (2)             | 2 (2)             | 2 (2)              | 2 (2)             | 2 (1)                            | 2 (1)                              |
| EspW               | 0                   | 0                 | 0                 | 0                  | 0                 | 0                                | 0                                  |
| EspX               | 1                   | 1                 | 1                 | 1                  | 1                 | 1                                | 1                                  |
| NleA/EspI          | 1                   | 1                 | 1                 | 1                  | 1                 | 1                                | 1                                  |
| NleB               | 3 (1)               | 3 (1)             | 2 (1)             | 3 (1)              | 3 (1)             | 3 (1)                            | 3 (1)                              |
| NleC               | 4 (1)               | 3 (1)             | 3 (2)             | 2 (1)              | 5 (1)             | 1 (1)                            | 2                                  |
| NleD               | 0                   | 0                 | 0                 | 0                  | 0                 | 0                                | 0                                  |
| NleE               | 1                   | 1                 | 1                 | 1                  | 1                 | 1                                | 1                                  |
| NleF               | 1                   | 1                 | 0                 | 1                  | 1                 | 1                                | 1                                  |
| NleG               | 4 (1)               | 4 (1)             | 4 (1)             | 4 (1)              | 4 (1)             | 6 (1)                            | 6 (1)                              |
| NleH               | 3 (1)               | 3 (1)             | 2 (1)             | 3 (1)              | 3 (1)             | 3 (1)                            | 2                                  |
| TccP/EspFu         | 1                   | 1                 | 1                 | 1                  | 1                 | 1                                | 1                                  |
| Cif                | 1                   | 1                 | 1                 | 1(1)               | 1                 | 1                                | 1                                  |
| OspB               | 1                   | 1                 | 1                 | 1                  | 1                 | 2 (1)                            | 2 (1)                              |
| OspG               | 0                   | 0                 | 0                 | 0                  | 0                 | 0                                | 0                                  |
| Total              | 38 (6)              | 36 (6)            | 34 (7)            | 35 (7)             | 39 (6)            | 38 (6)                           | 38 (4)                             |

Copy numbers including pseudogenes are shown. The numbers of pseudogenes are indicated in parentheses.

<sup>\*1</sup> Re-analyzed in this study.

<sup>\*2</sup> Effectors encoded in the LEE core region.



## References

1. **Ogura Y, Ooka T, Iguchi A, Toh H, Asadulghani M, et al.** Comparative genomics reveal the mechanism of the parallel evolution of O157 and non-O157 enterohemorrhagic *Escherichia coli*. *Proc Natl Acad Sci USA* 2009;106:17939–17944. doi: [10.1073/pnas.0903585106](https://doi.org/10.1073/pnas.0903585106)
2. **Hayashi T, Makino K, Ohnishi M, Kurokawa K, Ishii K, et al.** Complete genome sequence of enterohemorrhagic *Escherichia coli* O157:H7 and genomic comparison with a laboratory strain K-12. *DNA Res* 2001;8:11–22. doi: [10.1093/dnares/8.1.11](https://doi.org/10.1093/dnares/8.1.11)
3. **Ogura Y, Abe H, Katsura K, Kurokawa K, Asadulghani M, et al.** Systematic identification and sequence analysis of the genomic islands of the enteropathogenic *Escherichia coli* strain B171-8 by the combined use of whole-genome PCR scanning and fosmid mapping. *J Bacteriol* 2008;190:6948–6960. doi: [10.1128/JB.00625-08](https://doi.org/10.1128/JB.00625-08)
4. **Iguchi A, Thomson NR, Ogura Y, Saunders D, Ooka T, et al.** Complete genome sequence and comparative genome analysis of enteropathogenic *Escherichia coli* O127:H6 strain E2348/69. *J Bacteriol* 2009;191:347–354, doi: [10.1128/JB.01238-08](https://doi.org/10.1128/JB.01238-08)
5. **Iguchi A, Nagaya Y, Pradel E, Ooka T, Ogura Y, et al.** Genome evolution and plasticity of *Serratia marcescens*, an important multidrug-resistant nosocomial pathogen. *Genome Biol Evol* 2014;6:2096–2110, doi: [10.1093/gbe/evu160](https://doi.org/10.1093/gbe/evu160)
6. **Kleinheinz KA, Joensen KG, Larsen MV.** Applying the ResFinder and VirulenceFinder web-services for easy identification of acquired antibiotic resistance and *E. coli* virulence genes in bacteriophage and prophage nucleotide sequences. *Bacteriophage* 2014;4:e27943, doi: [10.4161/bact.27943](https://doi.org/10.4161/bact.27943)
7. **Ohtsubo Y, Ikeda-Ohtsubo W, Nagata Y, Tsuda M.** GenomeMatcher: A graphical user interface for DNA sequence comparison. *BMC Bioinformatics* 2008;9: 376, doi: [10.1186/1471-2105-9-376](https://doi.org/10.1186/1471-2105-9-376)
8. **Toro M, Cao G, Rump L, Nagaraja, TG, Meng J, et al.** Genome sequences of 64 non-O157:H7 Shiga toxin-producing *Escherichia coli* strains. *Genome Announc* 2015; 3: e01067-15, doi: [10.1128/genomeA.01067-15](https://doi.org/10.1128/genomeA.01067-15)

9. **Patel PN, Lindsey RL, Garcia-Toledo L, Rowe LA, Batra D, et al.** High-quality whole-genome sequences for 77 Shiga toxin-producing *Escherichia coli* strains generated with PacBio sequencing. *Genome Announc* 2018;6: e00391-18, doi: [10.1128/genomeA.00391-18](https://doi.org/10.1128/genomeA.00391-18)
10. **Parker CT, Cooper KK, Huynh S, Smith TP, Bono JL, et al.** Genome sequences of eight Shiga toxin-producing *Escherichia coli* strains isolated from a produce-growing region in California. *Microbiol Resour Announc* 2018;7:e00807-18, doi: [10.1128/MRA.00807-18](https://doi.org/10.1128/MRA.00807-18)
11. **Mercer RG, Zheng J, Garcia-Hernandez R, Ruan L, Gänzle MG, et al.** Genetic determinants of heat resistance in *Escherichia coli*. *Front Microbiol* 2015;6:932, doi: [10.3389/fmicb.2015.00932](https://doi.org/10.3389/fmicb.2015.00932)
12. **Haugum K, Johansen J, Gabrielsen C, Brandal LT, Bergh K, et al.** Comparative genomics to delineate pathogenic potential in non-O157 Shiga toxin-producing *Escherichia coli* (STEC) from patients with and without haemolytic uremic syndrome (HUS) in Norway. *PLoS One* 2014;9: e111788, doi: [10.1371/journal.pone.0111788](https://doi.org/10.1371/journal.pone.0111788)
13. **Ferdous M, Friedrich AW, Grundmann H, de Boer RF, Croughs PD, et al.** Molecular characterization and phylogeny of Shiga toxin-producing *Escherichia coli* isolates obtained from two Dutch regions using whole genome sequencing. *Clin Microbiol Infect* 2016;22: 642.e1-9, doi: [10.1016/j.cmi.2016.03.028](https://doi.org/10.1016/j.cmi.2016.03.028)
14. **Cooper KK, Mandrell RE, Louie JW, Korfach J, Clark TA, et al.** Comparative genomics of enterohemorrhagic *Escherichia coli* O145:H28 demonstrates a common evolutionary lineage with *Escherichia coli* O157:H7. *BMC Genomics* 2014;15:17, doi: [10.1186/1471-2164-15-17](https://doi.org/10.1186/1471-2164-15-17)
15. **Gabrielsen C, Drabløs F, Afset JE.** Genome sequences of 11 Shiga toxin-producing *Escherichia coli* strains. *Genome Announc* 2015;3:e00418-15, doi: [10.1128/genomeA.00418-15](https://doi.org/10.1128/genomeA.00418-15)
16. **Cooper KK, Mandrell RE, Louie JW, Korfach J, Clark TA, et al.** Complete genome sequences of two *Escherichia coli* O145:H28 outbreak strains of food origin. *Genome Announc* 2014;2: e00482-14, doi: [10.1128/genomeA.00482-14](https://doi.org/10.1128/genomeA.00482-14)
